# Supplementary material for: An integrative sustainability assessment of the Tsuji–Trost reaction simulating allylic amination under non-conventional (vs. conventional) conditions
Source: Royal Society of Chemistry journal article supplement (doi:10.1039/d3gc04216b), 2024-01-01

# Supporting Information

## **An integrative sustainability assessment of the Tsuji-Trost reaction simulating allylic amination under non-conventional (vs. conventional) conditions**

Sangita Dattatray Shinde,<sup>†</sup> Gargi Nikhil Vaidya,<sup>†</sup> Shyam Kumar Lokhande,<sup>†</sup> Anil Shaha, Ramesh Hiralal Choudhary, and Dinesh Kumar\*

Department of Medicinal Chemistry  
National Institute of Pharmaceutical Education and Research (NIPER) – Ahmedabad  
Palaj, Gandhinagar-382355, Gujarat, India

<sup>†</sup> These authors contributed equally.

## Table of Contents

|                                                                                                                                                                         |    |
|-------------------------------------------------------------------------------------------------------------------------------------------------------------------------|----|
| Table of Contents.....                                                                                                                                                  | 1  |
| 1. General information.....                                                                                                                                             | 2  |
| 2. Model reaction and conditions to access the allylic precursors.....                                                                                                  | 3  |
| 3. Selection of organic solvent for Ni(0)/DPPF-catalyzed allylic amination using 2a.....                                                                                | 4  |
| 4. Side reaction assessment (selected allylic precursors).....                                                                                                          | 5  |
| 5. Machine learning predictions of bond dissociation energies (BDEs).....                                                                                               | 9  |
| 6. Calculation of green metrics for active allylic precursors ('in-water' under Ni-catalysis).....                                                                      | 10 |
| 7. Demonstration of 'in-water' allylic amination using Ni(0) pre-catalyst.....                                                                                          | 27 |
| 7.1. Evaluation of Ni(0)-precatalysts, ligands, and optimisation study.....                                                                                             | 27 |
| 7.2. Scale up study using Ni (0) pre-catalyst in aqueous micellar.....                                                                                                  | 30 |
| 7.2. ICP-MS study.....                                                                                                                                                  | 31 |
| 7.3. Recyclability study under Ni (0) pre-catalyst in aqueous micellar.....                                                                                             | 32 |
| 7.4. Determination of Average particle size and Particle Distribution Index (PDI) of PTS-derived micelles (0 cycle vs. 6 <sup>th</sup> cycle) using the Zeta sizer..... | 33 |
| 7.5. Calculation of Green metrics for 1-(3-methoxyphenyl)piperazine ('in-water' under Ni-catalysis).....                                                                | 35 |
| 8. Spectroscopic characterization data.....                                                                                                                             | 37 |
| 9. NMR spectra ( <sup>1</sup> H, <sup>13</sup> C, <sup>19</sup> F).....                                                                                                 | 38 |

## 1. General information.

Unless otherwise noted, all manipulations (reactions) were carried out in oven-dried glassware in a glovebox under an atmosphere of dinitrogen. The concentration of reaction mixtures was done under reduced pressure by rotary evaporation at 25–50 °C at an appropriate pressure. Yields refer to purified and spectroscopically characterized compounds unless otherwise stated.

**Chemicals and solvents.** All the allylic precursors, catalysts, and ligands were purchased from Sigma-Aldrich. Other chemicals were purchased from Sigma-Aldrich, Alfa Aesar, and Spectrochem and used as received unless otherwise stated. Solvents like ethyl acetate, hexane, dichloromethane, methanol, and acetone were purchased from Fisher Scientific and used as received. All the reaction solvents and deuterated solvents were purchased from Sigma Aldrich and used as received.

**Purification method.** Thin layer chromatography (TLC) was performed using Merck TLC plates pre-coated with 250  $\mu\text{m}$  thickness silica gel 60 F254 plates and visualized by fluorescence quenching under UV light. The compounds were purified using column chromatography (100-200 and or 320-400 mesh size silica) and eluted using EtOAc: Hexane as mobile phase.

**Spectroscopic characterization.**  $^1\text{H}$  NMR and  $^{13}\text{C}$  NMR spectra were recorded on Bruker 500 MHz and 125 MHz spectrometers respectively using tetramethylsilane (1% v/v) as an internal standard. Both  $^1\text{H}$  and  $^{13}\text{C}$  NMR chemical shifts were reported in parts per million downfield from tetramethylsilane ( $\delta = 0$ ) with the solvent residual peak. Coupling constants ( $J$ ) were reported in hertz (Hz). Standard abbreviations indicating multiplicity were used as follows: s (singlet), b (broad), d (doublet), t (triplet), q (quartet), and m (multiplet). High-resolution mass spectra (HRMS) spectra of compounds were obtained at Agilent Q-TOF spectrometer in positive ( $\text{ESI}^+$ ) ion mode. Gas Chromatography-Mass Spectrometry (GC-MS) was performed on an Agilent Technologies 8890 GC system coupled with Agilent Technologies 7010B mass spectrometer (GC/TQ) using Agilent HP-5MS UI column (30 m  $\times$  250  $\mu\text{m}$ , 0.25  $\mu\text{m}$ ).

## 2. Model reaction and conditions to access the allylic precursors

### Method A

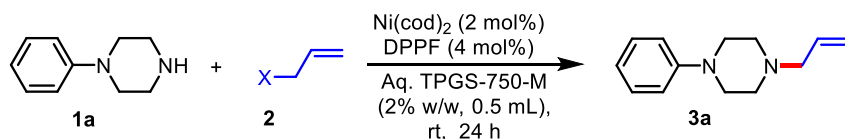

To a well cleaned tube equipped with a stir bar, Ni(cod)<sub>2</sub> (1.1 mg, 0.004 mmol, 2 mol%), DPPF (4.4 mg, 0.008 mmol, 4 mol%), 1-phenylpiperazine **1a** (32.4 mg, 30.5  $\mu$ L, 0.2 mmol), allylic precursor **2** (0.3 mmol, 1.5 equiv), and aqueous TPGS-750-M (2% w/w, 0.5 mL) were added. The resultant mixture was stirred at room temperature for 24 h. The reaction mixture was diluted with EtOAc (2 X 0.5 mL) and vortexed the resultant mixture. The supernatant liquid containing product and other organic residue was removed carefully. The recovered organic layer was dried over anhyd. Na<sub>2</sub>SO<sub>4</sub> and concentrated under reduced pressure. The crude products were adsorbed on silica gel and pass through the column (eluent: Hexane/EtOAc) to get analytically pure product **3a** as pale yellow liquid; <sup>1</sup>H NMR (500 MHz, CDCl<sub>3</sub>):  $\delta$  7.32 – 7.27 (m, 2H), 6.96 (d, *J* = 7.7 Hz, 2H), 6.89 (t, *J* = 7.3 Hz, 1H), 5.94 (ddt, *J* = 16.8, 10.1, 6.6 Hz, 1H), 5.27 (dq, *J* = 17.2, 1.6 Hz, 1H), 5.24 – 5.21 (m, 1H), 3.25 (t, *J* = 5.6 Hz, 4H), 3.10 (d, *J* = 6.7 Hz, 2H), 2.66 (t, *J* = 5.4 Hz, 4H); <sup>13</sup>C NMR (125 MHz, CDCl<sub>3</sub>):  $\delta$  151.2, 134.6, 129.0, 119.6, 118.4, 116.0, 61.7, 52.9, 49.0; HRMS (ESI-TOF) *m/z*: [M + H]<sup>+</sup> Calculated for C<sub>13</sub>H<sub>19</sub>N<sub>2</sub><sup>+</sup> 203.1543, Found 203.1543.

### Method B

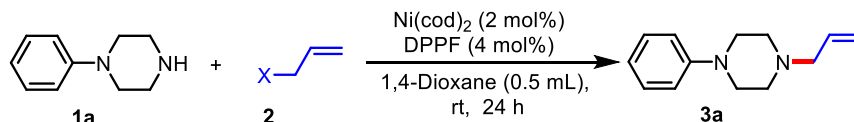

To a well cleaned tube equipped with a stir bar, Ni(cod)<sub>2</sub> (1.1 mg, 0.004 mmol, 2 mol%), DPPF (4.4 mg, 0.008 mmol, 4 mol%), 1-phenylpiperazine **1a** (32.4 mg, 30.5  $\mu$ L, 0.2 mmol), allylic precursor **2** (0.3 mmol, 1.5 equiv), and 1,4-dioxane (0.5 mL) were added. The resultant mixture was stirred at room temperature for 24 h. The reaction mixture was diluted with EtOAc (2 X 0.5 mL). The crude products were adsorbed on silica gel and pass through the column (eluent: Hexane/EtOAc) to get analytically pure product **3a**.

## Method C

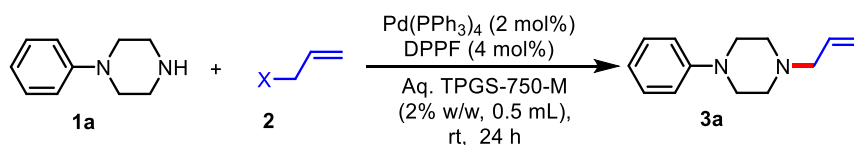

To a well cleaned tube equipped with a stir bar, Ni(cod)<sub>2</sub> (1.1 mg, 0.004 mmol, 2 mol%), DPPF (4.4 mg, 0.008 mmol, 4 mol%), 1-phenylpiperazine **1a** (32.4 mg, 30.5  $\mu$ L, 0.2 mmol), allylic precursor **2** (0.3 mmol, 1.5 equiv), and 1,4-dioxane (0.5 mL) were added. The resultant mixture was stirred at room temperature for 24 h. The reaction mixture was diluted with EtOAc (2 X 0.5 mL) and vortexed the resultant mixture. The supernatant liquid containing product and other organic residue was removed carefully. The recovered organic layer was dried over anhyd. Na<sub>2</sub>SO<sub>4</sub> and concentrated under reduced pressure. The crude products were adsorbed on silica gel and pass through the column (eluent: Hexane/EtOAc) to get analytically pure product **3a**.

### 3. Selection of organic solvent for Ni(0)/DPPF-catalyzed allylic amination using 2a.

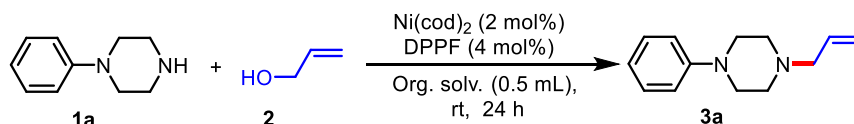

| Entry | Solvent      | Isolated yield/ <b>3a</b> (%) |
|-------|--------------|-------------------------------|
| 1     | Toluene      | 19                            |
| 2     | 1,4-Dioxane  | 48                            |
| 3     | THF          | 18                            |
| 4     | DMF          | traces                        |
| 5     | Acetonitrile | 45                            |

#### 4. Side reaction assessment (selected allylic precursors)

##### Side reaction assessment of allyl trifluoroacetate (2f) in aqueous medium

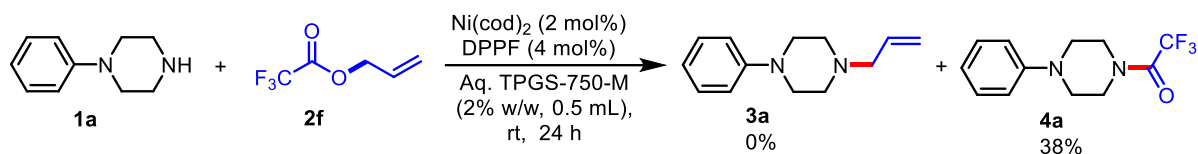

To a well cleaned tube equipped with a stir bar,  $\text{Ni}(\text{cod})_2$  (1.1 mg, 0.004 mmol, 2 mol%), DPPF (4.4 mg, 0.008 mmol, 4 mol%), 1-phenylpiperazine **1a** (32.4 mg, 30.5  $\mu\text{L}$ , 0.2 mmol), allyl trifluoroacetate **2f** (46.2 mg, 39.07  $\mu\text{L}$ , 0.3 mmol, 1.5 equiv), and aqueous TPGS-750-M (2% w/w, 0.5 mL) were added. The resultant mixture was stirred at room temperature for 24 h. The reaction mixture was diluted with EtOAc (2 X 0.5 mL) and vortexed the resultant mixture. The recovered organic layer was dried over anhyd.  $\text{Na}_2\text{SO}_4$  and concentrated under reduced pressure. The crude products were adsorbed on silica gel and pass through the column (eluent: Hexane/EtOAc) to get analytically pure 2,2,2-trifluoro-1-(4-phenylpiperazin-1-yl)ethan-1-one **4a** (19.6 mg, 38%) as pale yellow liquid.  $^1\text{H}$  NMR (500 MHz,  $\text{CDCl}_3$ ):  $\delta$  7.33 – 7.28 (m, 2H), 6.95 (dd,  $J$  = 8.2, 6.8 Hz, 3H), 3.88 – 3.83 (m, 2H), 3.77 (t,  $J$  = 5.0 Hz, 2H), 3.27 – 3.21 (m, 4H);  $^{13}\text{C}$  NMR (125 MHz,  $\text{CDCl}_3$ ):  $\delta$  150.5, 129.4, 121.1, 116.9, 116.5 (q,  $J$  = 286.1 Hz) 49.8, 49.3, 45.74 (q,  $J$  = 2.9 Hz), 43.3;  $^{19}\text{F}$  NMR (471 MHz,  $\text{CDCl}_3$ )  $\delta$  -68.76; GC-MS:  $R_t$  = 13.485;  $m/z$ :  $[\text{M}]^+$  Calculated for  $\text{C}_{12}\text{H}_{13}\text{F}_3\text{N}_2\text{O}^+$  258.1 Found 257.8

##### Side reaction assessment of allyl trifluoroacetate (2f) in organic medium

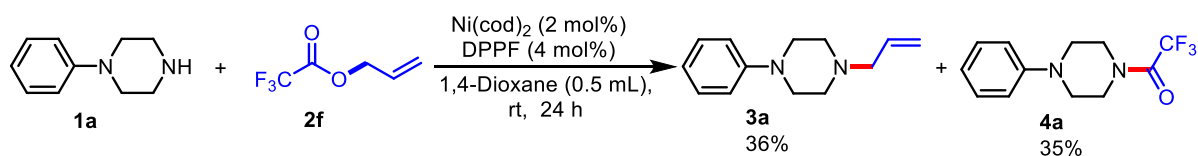

To a well cleaned tube equipped with a stir bar,  $\text{Ni}(\text{cod})_2$  (1.1 mg, 0.004 mmol, 2 mol%), DPPF (4.4 mg, 0.008 mmol, 4 mol%), 1-phenylpiperazine **1a** (32.4 mg, 30.5  $\mu\text{L}$ , 0.2 mmol), allyl trifluoroacetate **2f** (46.2 mg, 39.07  $\mu\text{L}$ , 0.3 mmol, 1.5 equiv), and 1,4-dioxane (2% w/w, 0.5 mL) were added. The resultant mixture was stirred at room temperature for 24 h. The reaction mixture was diluted with EtOAc (2 X 0.5 mL). The crude products were adsorbed on silica gel and pass through the column (eluent: Hexane/EtOAc) to get analytically pure product **3a** (14.5 mg, 36%) and **4a** (18.0 mg, 35%).

### Side reaction assessment of allyl oxalyl chloride (**2l**) in aqueous medium

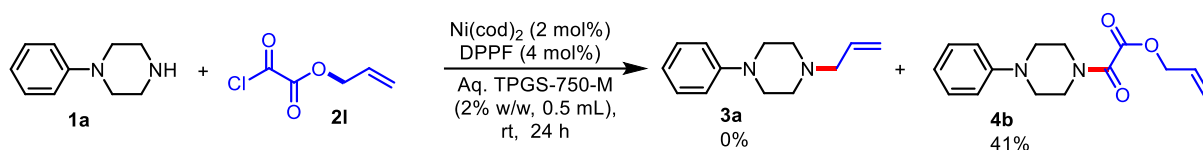

To a well cleaned tube equipped with a stir bar,  $\text{Ni(cod)}_2$  (1.1 mg, 0.004 mmol, 2 mol%), DPPF (4.4 mg, 0.008 mmol, 4 mol%), 1-phenylpiperazine **1a** (32.4 mg, 30.5  $\mu\text{L}$ , 0.2 mmol), allyl oxalyl chloride **2l** (44.56 mg, 36.7  $\mu\text{L}$ , 0.3 mmol, 1.5 equiv), and aqueous TPGS-750-M (2% w/w, 0.5 mL) were added. The resultant mixture was stirred at room temperature for 24 h. The reaction mixture was diluted with EtOAc (2 X 0.5 mL). The crude products were adsorbed on silica gel and pass through the column (eluent: Hexane/EtOAc) to get analytically pure product **4b** (22.45 mg, 41%) as yellow liquid.  $^1\text{H NMR}$  (500 MHz,  $\text{CDCl}_3$ ):  $\delta$  7.38 – 7.24 (m, 2H), 7.02 – 6.89 (m, 3H), 6.00 (ddt,  $J$  = 17.2, 10.4, 6.0 Hz, 1H), 5.45 (dq,  $J$  = 17.2, 1.5 Hz, 1H), 5.36 (dq,  $J$  = 10.4, 1.2 Hz, 1H), 4.81 (dt,  $J$  = 5.9, 1.3 Hz, 2H), 3.88 – 3.74 (m, 2H), 3.70 – 3.54 (m, 2H), 3.35 – 3.11 (m, 4H);  $^{13}\text{C NMR}$  (125 MHz,  $\text{CDCl}_3$ ):  $\delta$  162.2, 159.8, 150.7, 130.7, 129.3, 121.0, 120.1, 117.0, 66.5, 49.8, 49.2, 46.0, 41.4; **GC-MS**:  $R_t$  = 18.228;  $m/z$ :  $[\text{M}]^+$  Calculated for  $\text{C}_{15}\text{H}_{18}\text{N}_2\text{O}_3^+$  274.1 Found 273.8

### Side reaction assessment of allyl oxalyl chloride (**2l**) in organic medium

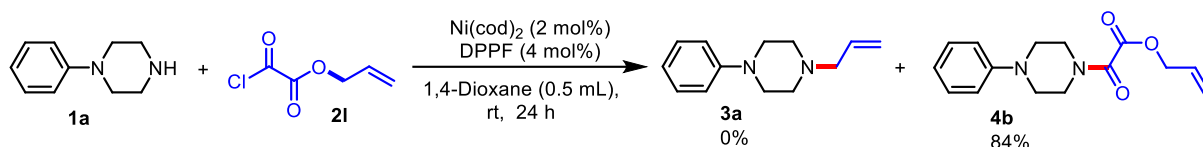

To a well cleaned tube equipped with a stir bar,  $\text{Ni(cod)}_2$  (1.1 mg, 0.004 mmol, 2 mol%), DPPF (4.4 mg, 0.008 mmol, 4 mol%), 1-phenylpiperazine **1a** (32.4 mg, 30.5  $\mu\text{L}$ , 0.2 mmol), allyl oxalyl chloride **2l** (44.56 mg, 36.7  $\mu\text{L}$ , 0.3 mmol, 1.5 equiv), and aqueous TPGS-750-M (2% w/w, 0.5 mL) were added. The resultant mixture was stirred at room temperature for 24 h. The reaction mixture was diluted with EtOAc (2 X 0.5 mL). The crude products were adsorbed on silica gel and pass through the column (eluent: Hexane/EtOAc) to get analytically pure product **4b** (46 mg, 84%).

### Side reaction assessment of allyl glycidyl ether (2p) in aqueous medium

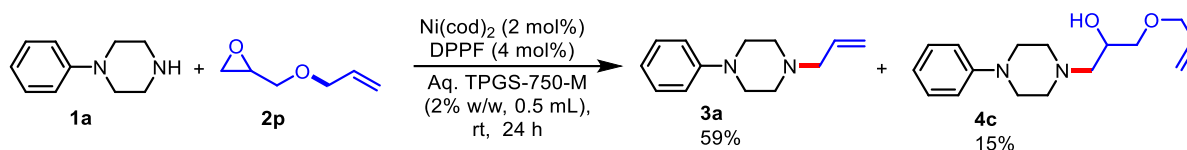

To a well cleaned tube equipped with a stir bar,  $\text{Ni(cod)}_2$  (1.1 mg, 0.004 mmol, 2 mol%), DPPF (4.4 mg, 0.008 mmol, 4 mol%), 1-phenylpiperazine **1a** (32.4 mg, 30.5  $\mu\text{L}$ , 0.2 mmol), allyl glycidyl ether **2p** (34.2 mg, 35.6  $\mu\text{L}$ , 0.3 mmol, 1.5 equiv), and aqueous TPGS-750-M (2% w/w, 0.5 mL) were added. The resultant mixture was stirred at room temperature for 24 h. The reaction mixture was diluted with EtOAc (2 X 0.5 mL) and vortexed the resultant mixture. The recovered organic layer was dried over anhyd.  $\text{Na}_2\text{SO}_4$  and concentrated under reduced pressure. The crude products were adsorbed on silica gel and pass through the column (eluent: Hexane/EtOAc) to get analytically pure product **3a** (23.8 mg, 59%) and 1-(allyloxy)-3-(4-phenylpiperazin-1-yl)propan-2-ol **4c** (8.3 mg, 15%) as colourless liquid.  $^1\text{H NMR}$  (500 MHz,  $\text{CDCl}_3$ ):  $\delta$  7.30 – 7.25 (m, 2H), 6.95 – 6.92 (m, 2H), 6.87 (t,  $J$  = 7.3 Hz, 1H), 5.92 (ddt,  $J$  = 17.3, 10.4, 5.7 Hz, 1H), 5.29 (dq,  $J$  = 17.2, 1.6 Hz, 1H), 5.20 (dq,  $J$  = 10.4, 1.4 Hz, 1H), 4.04 (dt,  $J$  = 5.7, 1.4 Hz, 2H), 4.00 (dq,  $J$  = 9.6, 4.5 Hz, 1H), 3.60 (s, 1H), 3.49 (qd,  $J$  = 9.9, 4.9 Hz, 2H), 3.24 (dt,  $J$  = 6.4, 4.1 Hz, 4H), 2.89 – 2.83 (m, 2H), 2.71 – 2.64 (m, 2H), 2.62 – 2.57 (m, 1H), 2.52 (dd,  $J$  = 12.5, 3.5 Hz, 1H).;  $^{13}\text{C NMR}$  (125 MHz,  $\text{CDCl}_3$ ):  $\delta$  151.1, 134.6, 129.2, 120.0, 117.4, 116.2, 72.5, 72.4, 66.0, 60.8, 53.3, 49.0; **GC-MS**:  $R_t$  = 16.325;  $m/z$ :  $[\text{M}]^+$  Calculated for  $\text{C}_{16}\text{H}_{24}\text{N}_2\text{O}_2^+$  276.2 Found 275.9.

### Side reaction assessment of allyl glycidyl ether (2p) in organic medium

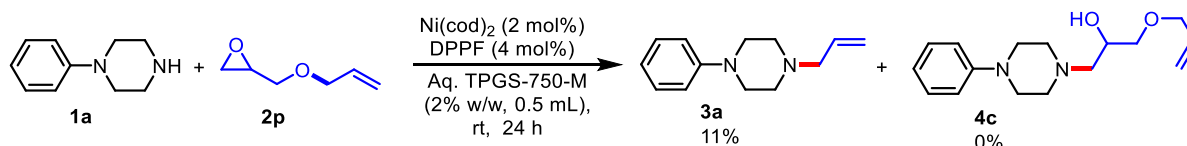

To a well cleaned tube equipped with a stir bar,  $\text{Ni(cod)}_2$  (1.1 mg, 0.004 mmol, 2 mol%), DPPF (4.4 mg, 0.008 mmol, 4 mol%), 1-phenylpiperazine **1a** (32.4 mg, 30.5  $\mu\text{L}$ , 0.2 mmol), allyl glycidyl ether **2p** (34.2 mg, 35.6  $\mu\text{L}$ , 0.3 mmol, 1.5 equiv), and aqueous TPGS-750-M (2% w/w, 0.5 mL) were added. The resultant mixture was stirred at room temperature for 24 h. The reaction mixture was diluted with EtOAc (2 X 0.5 mL). The crude products were adsorbed on silica gel and pass through the column (eluent: Hexane/EtOAc) to get analytically pure product **3a** (4.4 mg, 11%).



### Side reaction assessment of allyl isocyanate (2s) in aqueous medium

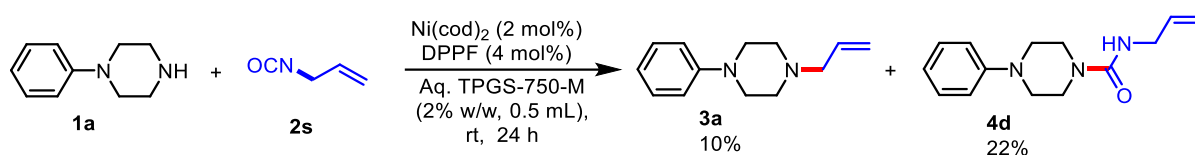

To a well cleaned tube equipped with a stir bar,  $\text{Ni(cod)}_2$  (1.1 mg, 0.004 mmol, 2 mol%), DPPF (4.4 mg, 0.008 mmol, 4 mol%), 1-phenylpiperazine **1a** (32.4 mg, 30.5  $\mu\text{L}$ , 0.2 mmol), allyl isocyanate **2s** (24.9 mg, 26.5  $\mu\text{L}$ , 0.3 mmol, 1.5 equiv), and aqueous TPGS-750-M (2% w/w, 0.5 mL) were added. The resultant mixture was stirred at room temperature for 24 h. The reaction mixture was diluted with EtOAc (2 X 0.5 mL) and vortexed the resultant mixture. The recovered organic layer was dried over anhyd.  $\text{Na}_2\text{SO}_4$  and concentrated under reduced pressure. The crude products were adsorbed on silica gel and pass through the column (eluent: Hexane/EtOAc) to get analytically pure product **3a** (4.0 mg, 10%) and *N*-allyl-4-phenylpiperazine-1-carboxamide **4d** (10.8 mg, 22%) pale yellow semisolid.  $^1\text{H}$  NMR (500 MHz,  $\text{CDCl}_3$ ):  $\delta$  7.32 – 7.24 (m, 2H), 7.00 – 6.84 (m, 3H), 5.90 (ddt,  $J$  = 17.2, 10.2, 5.7 Hz, 1H), 5.20 (dq,  $J$  = 17.1, 1.7 Hz, 1H), 5.12 (dq,  $J$  = 10.2, 1.5 Hz, 1H), 4.68 (s, 1H), 3.89 (tt,  $J$  = 5.6, 1.6 Hz, 1H), 3.63 – 3.43 (m, 4H), 3.43 – 3.00 (m, 4H);  $^{13}\text{C}$  NMR (125 MHz,  $\text{CDCl}_3$ ):  $\delta$  157.4, 151.0, 135.5, 129.3, 120.4, 116.5, 115.9, 49.2, 43.8, 43.5. GC-MS:  $R_t$  = 18.187;  $m/z$ :  $[\text{M}]^+$  Calculated for  $\text{C}_{14}\text{H}_{19}\text{N}_3\text{O}^+$  245.2 Found 244.8.

### Side reaction assessment of allyl isocyanate (2s) in organic medium

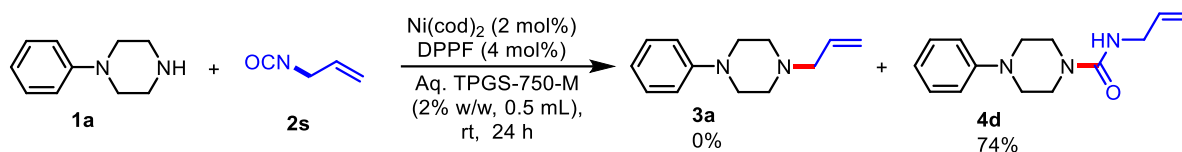

To a well cleaned tube equipped with a stir bar,  $\text{Ni(cod)}_2$  (1.1 mg, 0.004 mmol, 2 mol%), DPPF (4.4 mg, 0.008 mmol, 4 mol%), 1-phenylpiperazine **1a** (32.4 mg, 30.5  $\mu\text{L}$ , 0.2 mmol), allyl isocyanate **2s** (24.9 mg, 26.5  $\mu\text{L}$ , 0.3 mmol, 1.5 equiv), and aqueous TPGS-750-M (2% w/w, 0.5 mL) were added. The resultant mixture was stirred at room temperature for 24 h. The reaction mixture was diluted with EtOAc (2 X 0.5 mL). The crude products were adsorbed on silica gel and pass through the column (eluent: Hexane/EtOAc) to get analytically pure product **4d** (36.23 mg, 74%).

## 5. Machine learning predictions of bond dissociation energies (BDEs)

This tool predicts BDEs for single, noncyclic bonds in neutral organic molecules consisting of C, H, O, and N atoms. Mean absolute errors are typically less than 1 kcal/mol for most compounds.

<https://bde.ml.nrel.gov/>

| Code | Allylic Precursor                                                                   | Bond Dissociation Energy | Code | Allylic Precursor                                                                    | Bond Dissociation Energy |
|------|-------------------------------------------------------------------------------------|--------------------------|------|--------------------------------------------------------------------------------------|--------------------------|
| 2a   | 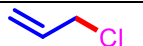   | 70.6 Kcal/mol            | 2n   |    | 70.8 Kcal/mol            |
| 2b   |    | 57.4 Kcal/mol            | 2o   |    | 55.4 Kcal/mol            |
| 2c   |    | 40.3 Kcal/mol            | 2p   |    | 71.0 Kcal/mol            |
| 2d   |    | 81.5 Kcal/mol            | 2q   |    | 69.1 Kcal/mol            |
| 2e   |    | 79.1 Kcal/mol            | 2r   |    | 78.8 Kcal/mol            |
| 2f   |    | 82.7 Kcal/mol            | 2s   |    | 78.1 Kcal/mol            |
| 2g   |    | 81.1 Kcal/mol            | 2t   |    | 48.9 Kcal/mol            |
| 2h   |   | 79.6 Kcal/mol            | 2u   |   | 60.8 Kcal/mol            |
| 2i   |  | 80.1 Kcal/mol            | 2v   |  | 56.0 Kcal/mol            |
| 2j   |  | 78.7 kcal/mol            | 2w   |  | 77.7 Kcal/mol            |
| 2k   |  | 79.8 Kcal/mol            | 2x   |  | Not available            |
| 2l   |  | 82.0 Kcal/mol            | 2y   |  | Not available            |
| 2m   |  | 70.6 Kcal/mol            | 2z   |  | 87.5 Kcal/mol            |

References. St. John, P.C., Guan, Y., Kim, Y., Kim, S., and Paton, R.S. Nat Commun 11, 2328 (2020). <https://doi.org/10.1038/s41467-020-16201-z>

St. John, P.C., Guan, Y., Kim, Y., Etz, B.D., Kim S., and Paton, R.S. Sci Data 7, 244 (2020). <https://doi.org/10.1038/s41597-020-00588-x>

## 6. Calculation of green metrics for active allylic precursors ('in-water' under Ni-catalysis)

| Code      | Allyl source            | E-Factor | %Atom economy | %Atom efficiency | %RME  | Relative EcoScale |
|-----------|-------------------------|----------|---------------|------------------|-------|-------------------|
| <b>2a</b> | Allyl chloride          | 7.07     | 84.66         | 14.39            | 12.38 | 43.5              |
| <b>2b</b> | Allyl bromide           | 1.50     | 71.37         | 48.53            | 39.93 | 69                |
| <b>2c</b> | Allyl iodide            | 1.97     | 61.21         | 42.23            | 33.62 | 69.5              |
| <b>2d</b> | Allyl alcohol           | 0.38     | 91.75         | 81.65            | 72.04 | 79.5              |
| <b>2e</b> | Allyl acetate           | 0.79     | 77.04         | 66.25            | 55.56 | 78                |
| <b>2g</b> | Allyl cinnamate         | 1.68     | 57.68         | 47.29            | 37.23 | 81                |
| <b>2h</b> | Allyl methyl carbonate  | 1.05     | 72.62         | 58.82            | 48.59 | 75.5              |
| <b>2i</b> | Allyl phenyl carbonate  | 1.53     | 59.38         | 49.87            | 39.48 | 82                |
| <b>2j</b> | Allyl carbamate         | 0.82     | 76.76         | 65.24            | 54.69 | 82.5              |
| <b>2k</b> | Allyl diethyl phosphate | 1.6      | 56.71         | 47.63            | 37.40 | 82                |
| <b>2m</b> | Allyl imidate           | 2.9      | 55.42         | 32.69            | 30.93 | 59.5              |
| <b>2o</b> | Allyl phenyl ether      | 1.2      | 68.19         | 55.23            | 44.99 | 70.5              |
| <b>2p</b> | Allyl glycidyl ether    | 1.8      | 73.14         | 41.68            | 34.52 | 63.5              |
| <b>2q</b> | N-Allylmethylamine      | 0.7      | 86.60         | 65.81            | 57.10 | 86.5              |
| <b>2s</b> | Allyl isocyanate        | 5.7      | 82.39         | 17.30            | 14.77 | 45.5              |
| <b>2v</b> | Allyl phenyl sulphone   | 2.3      | 58.68         | 37.55            | 29.66 | 72                |

## Calculation of Green metrics for allyl chloride ('in-water' under Ni-catalysis)

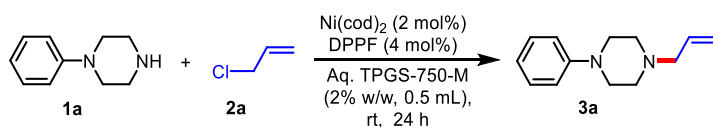

| Entities | Molecular mass | Quantity used |
|----------|----------------|---------------|
| 1a       | 162.23         | 32.44 mg      |
| 2a       | 76.52          | 22.95 mg      |
| 3a       | 202.14         | 6.86 mg       |

**Atom economy** Molecular mass of desired product / Molecular mass of all reactant X 100  
 $202.14 / 162.23 + 76.52 \times 100 = 84.66\%$

**Atom efficiency** % Yield of desired product X % Atom economy / 100  
 $17 \times 84.66 / 100 = 14.39\%$

**RME** mass of desired product / total mass of reactants X 100  
 $6.86 / 55.39 \times 100 = 12.38\%$

**E-factor** Amount of organic waste (mg) / Amount of product (mg)  
 (Total reaction mixture (mg) – Amount of product (mg)) / Amount of product (mg)  
 $(55.39 - 6.86) / 6.86 = 48.53 / 6.86 = 7.07$

**\*Relative EcoScale** 100 – sum of individual penalties  
 $100 - 56.5 = 43.5$

| Calculation of Penalty points                                           |                     |
|-------------------------------------------------------------------------|---------------------|
| Parameter                                                               | Penalty points      |
| <b>1. Yield</b>                                                         | $(100-17)/2 = 41.5$ |
| <b>2. Price of allyl chloride</b><br>(to obtain 10 mmol of end product) |                     |
| Inexpensive (< \$10)                                                    | 0                   |
| Expensive (> \$10 and < \$50)                                           | 0                   |
| Very expensive (> \$50)                                                 | 5                   |
| <b>3. Safety</b>                                                        |                     |
| N (dangerous for environment)                                           | 0                   |
| T (toxic)                                                               | 5                   |
| F (highly flammable)                                                    | 5                   |
| E (explosive)                                                           | 0                   |
| F+ (extremely flammable)                                                | 0                   |
| T+ (extremely toxic)                                                    | 0                   |
| <b>4. Technical setup</b>                                               |                     |
| <b>5. Temperature/time</b>                                              |                     |
| <b>6. Workup and purification</b>                                       |                     |
| <b>Total</b>                                                            | <b>56.5</b>         |

\*The EcoScale has been represented as a relative EcoScale, wherein the common parameters (Technical setup, Temperature/time, workup, and Purification) have been excluded while calculating the penalty points as they will be the same in all the cases.

## Calculation of Green metrics for allyl bromide ('in-water' under Ni-catalysis)

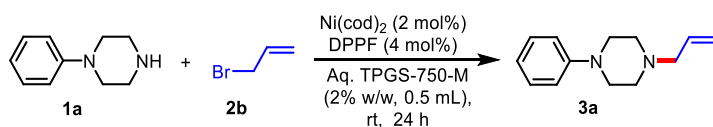

| Entities  | Molecular mass | Quantity used |
|-----------|----------------|---------------|
| <b>1a</b> | 162.23         | 32.44 mg      |
| <b>2b</b> | 120.98         | 36.29 mg      |
| <b>3a</b> | 202.14         | 27.45 mg      |

**Atom economy**      Molecular mass of desired product / Molecular mass of all reactant **X** 100  
 $202.14 / 162.23 + 120.98 \times 100 = 71.37\%$

**Atom efficiency**      % Yield of desired product **X** % Atom economy / 100  
 $68 \times 71.37 / 100 = 48.53\%$

**RME**      mass of desired product / total mass of reactants **X** 100  
 $27.45 / 68.73 \times 100 = 39.93\%$

**E-factor**      Amount of organic waste (mg) / Amount of product (mg)  
 (Total reaction mixture (mg) – Amount of product (mg)) / Amount of product (mg)  
 $(68.73 - 27.45) / 27.45 = 41.28 / 27.45 = 1.50$

**\*Relative EcoScale**      100 – sum of individual penalties  
 $100 - 31 = 69$

| Calculation of Penalty points                                           |                       |
|-------------------------------------------------------------------------|-----------------------|
| Parameter                                                               | Penalty points        |
| <b>1. Yield</b>                                                         | $(100 - 68) / 2 = 16$ |
| <b>2. Price of allyl chloride</b><br>(to obtain 10 mmol of end product) |                       |
| Inexpensive (< \$10)                                                    | 0                     |
| Expensive (> \$10 and < \$50)                                           | 0                     |
| Very expensive (> \$50)                                                 | 5                     |
| <b>3. Safety</b>                                                        |                       |
| N (dangerous for environment)                                           | 0                     |
| T (toxic)                                                               | 5                     |
| F (highly flammable)                                                    | 5                     |
| E (explosive)                                                           | 0                     |
| F+ (extremely flammable)                                                | 0                     |
| T+ (extremely toxic)                                                    | 0                     |
| <b>4. Technical setup</b>                                               |                       |
| <b>5. Temperature/time</b>                                              |                       |
| <b>6. Workup and purification</b>                                       |                       |
| <b>Total</b>                                                            | <b>31</b>             |

\*The EcoScale has been represented as a relative EcoScale, wherein the common parameters (Technical setup, Temperature/time, workup, and Purification) have been excluded while calculating the penalty points as they will be the same in all the cases.

## Calculation of Green metrics for allyl Iodide ('in-water' under Ni-catalysis)

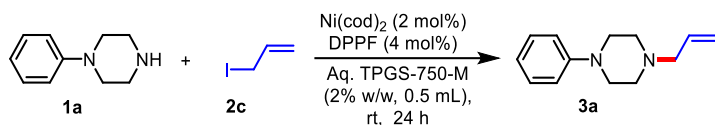

| Entities | Molecular mass | Quantity used |
|----------|----------------|---------------|
| 1a       | 162.23         | 32.44 mg      |
| 2c       | 167.98         | 50.39 mg      |
| 3a       | 202.14         | 27.85 mg      |

**Atom economy** Molecular mass of desired product / Molecular mass of all reactant X 100  
 $202.14 / 162.23 + 167.98 \times 100 = 61.21\%$

**Atom efficiency** % Yield of desired product X % Atom economy / 100  
 $69 \times 61.21 / 100 = 42.23\%$

**RME** mass of desired product / total mass of reactants X 100  
 $27.85 / 82.83 \times 100 = 33.62\%$

**E-factor** Amount of organic waste (mg) / Amount of product (mg)  
 (Total reaction mixture (mg) – Amount of product (mg)) / Amount of product (mg)  
 $(82.83 - 27.85) / 27.85 = 54.98 / 27.85 = 1.97$

**\*Relative EcoScale** 100 – sum of individual penalties  
 $100 - 30.5 = 69.5$

| Calculation of Penalty points                                           |                         |
|-------------------------------------------------------------------------|-------------------------|
| Parameter                                                               | Penalty points          |
| <b>1. Yield</b>                                                         | $(100 - 69) / 2 = 15.5$ |
| <b>2. Price of allyl chloride</b><br>(to obtain 10 mmol of end product) |                         |
| Inexpensive (< \$10)                                                    | 0                       |
| Expensive (> \$10 and < \$50)                                           | 0                       |
| Very expensive (> \$50)                                                 | 5                       |
| <b>3. Safety</b>                                                        |                         |
| N (dangerous for environment)                                           | 0                       |
| T (toxic)                                                               | 5                       |
| F (highly flammable)                                                    | 5                       |
| E (explosive)                                                           | 0                       |
| F+ (extremely flammable)                                                | 0                       |
| T+ (extremely toxic)                                                    | 0                       |
| <b>4. Technical setup</b>                                               |                         |
| <b>5. Temperature/time</b>                                              |                         |
| <b>6. Workup and purification</b>                                       |                         |
| <b>Total</b>                                                            | <b>30.5</b>             |

\*The EcoScale has been represented as a relative EcoScale, wherein the common parameters (Technical setup, Temperature/time, workup, and Purification) have been excluded while calculating the penalty points as they will be the same in all the cases.

## Calculation of Green metrics for allyl alcohol ('in-water' under Ni-catalysis)

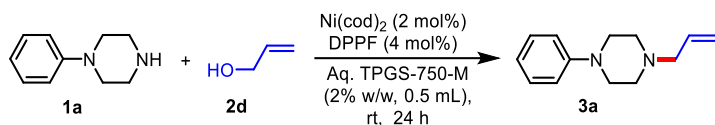

| Entities  | Molecular mass | Quantity used |
|-----------|----------------|---------------|
| <b>1a</b> | 162.23         | 32.44 mg      |
| <b>2d</b> | 58.07          | 17.42 mg      |
| <b>3a</b> | 202.14         | 35.92 mg      |

**Atom economy** Molecular mass of desired product / Molecular mass of all reactant X 100  
 $202.14 / 162.23 + 58.07 \times 100 = 91.75\%$

**Atom efficiency** % Yield of desired product X % Atom economy / 100  
 $89 \times 91.75 / 100 = 81.65\%$

**RME** mass of desired product / total mass of reactants X 100  
 $35.92 / 49.86 \times 100 = 72.04\%$

**E-factor** Amount of organic waste (mg) / Amount of product (mg)  
 (Total reaction mixture (mg) – Amount of product (mg)) / Amount of product (mg)  
 $(49.86 - 35.92) / 35.92 = 85.78 / 35.92 = 0.38$

**\*Relative EcoScale** 100 – sum of individual penalties  
 $100 - 20.5 = 79.5$

| Calculation of Penalty points                                           |                        |
|-------------------------------------------------------------------------|------------------------|
| Parameter                                                               | Penalty points         |
| <b>1. Yield</b>                                                         | $(100 - 89) / 2 = 5.5$ |
| <b>2. Price of allyl chloride</b><br>(to obtain 10 mmol of end product) |                        |
| Inexpensive (< \$10)                                                    | 0                      |
| Expensive (> \$10 and < \$50)                                           | 0                      |
| Very expensive (> \$50)                                                 | 5                      |
| <b>3. Safety</b>                                                        |                        |
| N (dangerous for environment)                                           | 0                      |
| T (toxic)                                                               | 5                      |
| F (highly flammable)                                                    | 5                      |
| E (explosive)                                                           | 0                      |
| F+ (extremely flammable)                                                | 0                      |
| T+ (extremely toxic)                                                    | 0                      |
| <b>4. Technical setup</b>                                               |                        |
| <b>5. Temperature/time</b>                                              |                        |
| <b>6. Workup and purification</b>                                       |                        |
| <b>Total</b>                                                            | <b>20.5</b>            |

\*The EcoScale has been represented as a relative EcoScale, wherein the common parameters (Technical setup, Temperature/time, workup, and Purification) have been excluded while calculating the penalty points as they will be the same in all the cases.

## Calculation of Green metrics for allyl acetate ('in-water' under Ni-catalysis)

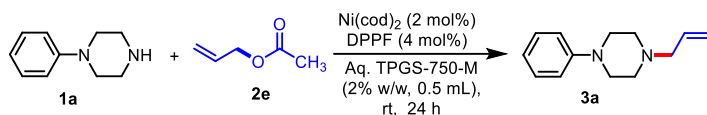

| Entities  | Molecular mass | Quantity used |
|-----------|----------------|---------------|
| <b>1a</b> | 162.23         | 32.44 mg      |
| <b>2e</b> | 100.12         | 30.03 mg      |
| <b>3a</b> | 202.14         | 34.71 mg      |

**Atom economy**      Molecular mass of desired product / Molecular mass of all reactant **X** 100  
 $202.14 / 162.23 + 100.12 \times 100 = 77.04\%$

**Atom efficiency**      % Yield of desired product **X** % Atom economy / 100  
 $86 \times 77.04 / 100 = 66.25\%$

**RME**      mass of desired product / total mass of reactants **X** 100  
 $34.71 / 62.47 \times 100 = 55.56\%$

**E-factor**      Amount of organic waste (mg) / Amount of product (mg)  
 (Total reaction mixture (mg) – Amount of product (mg)) / Amount of product (mg)  
 $(62.47 - 34.71) / 34.71 = 27.76 / 34.71 = 0.79$

**\*Relative EcoScale**      100 – sum of individual penalties  
 $100 - 22 = 78$

| Calculation of Penalty points                                           |                      |
|-------------------------------------------------------------------------|----------------------|
| Parameter                                                               | Penalty points       |
| <b>1. Yield</b>                                                         | $(100 - 86) / 2 = 7$ |
| <b>2. Price of allyl chloride</b><br>(to obtain 10 mmol of end product) |                      |
| Inexpensive (< \$10)                                                    | 0                    |
| Expensive (> \$10 and < \$50)                                           | 0                    |
| Very expensive (> \$50)                                                 | 5                    |
| <b>3. Safety</b>                                                        |                      |
| N (dangerous for environment)                                           | 0                    |
| T (toxic)                                                               | 5                    |
| F (highly flammable)                                                    | 5                    |
| E (explosive)                                                           | 0                    |
| F+ (extremely flammable)                                                | 0                    |
| T+ (extremely toxic)                                                    | 0                    |
| <b>4. Technical setup</b>                                               |                      |
| <b>5. Temperature/time</b>                                              |                      |
| <b>6. Workup and purification</b>                                       |                      |
| <b>Total</b>                                                            | <b>22</b>            |

\*The EcoScale has been represented as a relative EcoScale, wherein the common parameters (Technical setup, Temperature/time, workup, and Purification) have been excluded while calculating the penalty points as they will be the same in all the cases.



## Calculation of Green metrics for allyl cinnamate ('in-water' under Ni-catalysis)

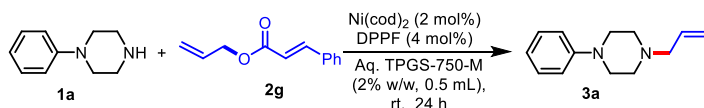

| Entities  | Molecular mass | Quantity used |
|-----------|----------------|---------------|
| <b>1a</b> | 162.23         | 32.44 mg      |
| <b>2g</b> | 188.22         | 56.46 mg      |
| <b>3a</b> | 202.14         | 33.10 mg      |

**Atom economy**      Molecular mass of desired product / Molecular mass of all reactant X 100  
 $202.14 / 162.23 + 188.22 \times 100 = 57.68\%$

**Atom efficiency**      % Yield of desired product X % Atom economy / 100  
 $82 \times 57.68 / 100 = 47.29\%$

**RME**      mass of desired product / total mass of reactants X 100  
 $33.10 / 88.90 \times 100 = 37.23\%$

**E-factor**      Amount of organic waste (mg) / Amount of product (mg)  
 (Total reaction mixture (mg) – Amount of product (mg)) / Amount of product (mg)  
 $(88.90 - 33.10) / 33.10 = 55.8 / 33.10 = 1.68$

**\*Relative EcoScale**      100 – sum of individual penalties  
 $100 - 19 = 81$

| Calculation of Penalty points                                           |                      |
|-------------------------------------------------------------------------|----------------------|
| Parameter                                                               | Penalty points       |
| <b>1. Yield</b>                                                         | $(100 - 82) / 2 = 9$ |
| <b>2. Price of allyl chloride</b><br>(to obtain 10 mmol of end product) |                      |
| Inexpensive (< \$10)                                                    | 0                    |
| Expensive (> \$10 and < \$50)                                           | 0                    |
| Very expensive (> \$50)                                                 | 5                    |
| <b>3. Safety</b>                                                        |                      |
| N (dangerous for environment)                                           | 0                    |
| T (toxic)                                                               | 5                    |
| F (highly flammable)                                                    | 0                    |
| E (explosive)                                                           | 0                    |
| F+ (extremely flammable)                                                | 0                    |
| T+ (extremely toxic)                                                    | 0                    |
| <b>4. Technical setup</b>                                               |                      |
| <b>5. Temperature/time</b>                                              |                      |
| <b>6. Workup and purification</b>                                       |                      |
| <b>Total</b>                                                            | <b>19</b>            |

\*The EcoScale has been represented as a relative EcoScale, wherein the common parameters (Technical setup, Temperature/time, workup, and Purification) have been excluded while calculating the penalty points as they will be the same in all the cases.

## Calculation of Green metrics for allyl methyl carbonate ('in-water' under Ni-catalysis)

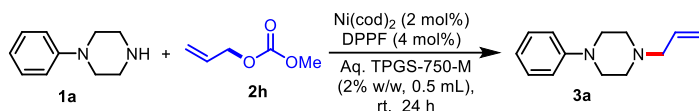

| Entities  | Molecular mass | Quantity used |
|-----------|----------------|---------------|
| <b>1a</b> | 162.23         | 32.44 mg      |
| <b>2h</b> | 116.12         | 34.83 mg      |
| <b>3a</b> | 202.14         | 32.69 mg      |

**Atom economy**      Molecular mass of desired product / Molecular mass of all reactant X 100  
 $202.14 / 162.23 + 116.12 \times 100 = 72.62\%$

**Atom efficiency**      % Yield of desired product X % Atom economy / 100  
 $81 \times 72.62 / 100 = 58.82\%$

**RME**      mass of desired product / total mass of reactants X 100  
 $32.69 / 67.27 \times 100 = 48.59\%$

**E-factor**      Amount of organic waste (mg) / Amount of product (mg)  
 (Total reaction mixture (mg) – Amount of product (mg)) / Amount of product (mg)  
 $(67.27 - 32.69) / 32.69 = 34.58 / 32.69 = 1.05$

**\*Relative EcoScale**      100 – sum of individual penalties  
 $100 - 24.5 = 75.5$

| Calculation of Penalty points                                           |                        |
|-------------------------------------------------------------------------|------------------------|
| Parameter                                                               | Penalty points         |
| <b>1. Yield</b>                                                         | $(100 - 81) / 2 = 9.5$ |
| <b>2. Price of allyl chloride</b><br>(to obtain 10 mmol of end product) |                        |
| Inexpensive (< \$10)                                                    | 0                      |
| Expensive (> \$10 and < \$50)                                           | 0                      |
| Very expensive (> \$50)                                                 | 5                      |
| <b>3. Safety</b>                                                        |                        |
| N (dangerous for environment)                                           | 0                      |
| T (toxic)                                                               | 5                      |
| F (highly flammable)                                                    | 5                      |
| E (explosive)                                                           | 0                      |
| F+ (extremely flammable)                                                | 0                      |
| T+ (extremely toxic)                                                    | 0                      |
| <b>4. Technical setup</b>                                               |                        |
| <b>5. Temperature/time</b>                                              |                        |
| <b>6. Workup and purification</b>                                       |                        |
| <b>Total</b>                                                            | <b>24.5</b>            |

\*The EcoScale has been represented as a relative EcoScale, wherein the common parameters (Technical setup, Temperature/time, workup, and Purification) have been excluded while calculating the penalty points as they will be the same in all the cases.

## Calculation of Green metrics for allyl phenyl carbonate ('in-water' under Ni-catalysis)

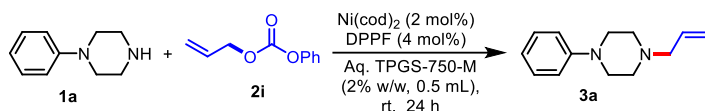

| Entities  | Molecular mass | Quantity used |
|-----------|----------------|---------------|
| <b>1a</b> | 162.23         | 32.44 mg      |
| <b>2h</b> | 178.18         | 53.45 mg      |
| <b>3a</b> | 202.14         | 33.91 mg      |

**Atom economy**      Molecular mass of desired product / Molecular mass of all reactant **X** 100  
 $202.14 / 162.23 + 178.18 \times 100 = 59.38\%$

**Atom efficiency**      % Yield of desired product **X** % Atom economy / 100  
 $84 \times 59.38 / 100 = 49.87\%$

**RME**      mass of desired product / total mass of reactants **X** 100  
 $33.91 / 85.89 \times 100 = 39.48\%$

**E-factor**      Amount of organic waste (mg) / Amount of product (mg)  
 (Total reaction mixture (mg) – Amount of product (mg)) / Amount of product (mg)  
 $(85.89 - 33.91) / 33.91 = 51.98 / 33.91 = 1.53$

**\*Relative EcoScale**      100 – sum of individual penalties  
 $100 - 18 = 82$

| Calculation of Penalty points                                           |                      |
|-------------------------------------------------------------------------|----------------------|
| Parameter                                                               | Penalty points       |
| <b>1. Yield</b>                                                         | $(100 - 84) / 2 = 8$ |
| <b>2. Price of allyl chloride</b><br>(to obtain 10 mmol of end product) |                      |
| Inexpensive (< \$10)                                                    | 0                    |
| Expensive (> \$10 and < \$50)                                           | 0                    |
| Very expensive (> \$50)                                                 | 5                    |
| <b>3. Safety</b>                                                        |                      |
| N (dangerous for environment)                                           | 0                    |
| T (toxic)                                                               | 5                    |
| F (highly flammable)                                                    | 0                    |
| E (explosive)                                                           | 0                    |
| F+ (extremely flammable)                                                | 0                    |
| T+ (extremely toxic)                                                    | 0                    |
| <b>4. Technical setup</b>                                               |                      |
| <b>5. Temperature/time</b>                                              |                      |
| <b>6. Workup and purification</b>                                       |                      |
| <b>Total</b>                                                            | <b>18</b>            |

\*The EcoScale has been represented as a relative EcoScale, wherein the common parameters (Technical setup, Temperature/time, workup, and Purification) have been excluded while calculating the penalty points as they will be the same in all the cases.

## Calculation of Green metrics for allyl carbamate ('in-water' under Ni-catalysis)

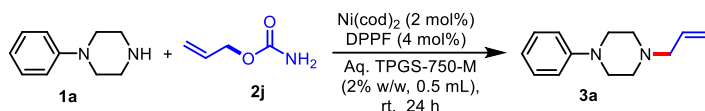

| Entities  | Molecular mass | Quantity used |
|-----------|----------------|---------------|
| <b>1a</b> | 162.23         | 32.44 mg      |
| <b>2h</b> | 101.10         | 30.33 mg      |
| <b>3a</b> | 202.14         | 34.31 mg      |

**Atom economy**      Molecular mass of desired product / Molecular mass of all reactant X 100  
 $202.14 / 162.23 + 101.10 \times 100 = 76.76\%$

**Atom efficiency**      % Yield of desired product X % Atom economy / 100  
 $85 \times 76.76 / 100 = 65.24\%$

**RME**      mass of desired product / total mass of reactants X 100  
 $34.31 / 62.73 \times 100 = 54.69\%$

**E-factor**      Amount of organic waste (mg) / Amount of product (mg)  
 (Total reaction mixture (mg) – Amount of product (mg)) / Amount of product (mg)  
 $(62.73 - 34.31) / 34.31 = 28.42 / 34.31 = 0.82$

**\*Relative EcoScale**      100 – sum of individual penalties  
 $100 - 17.5 = 82.5$

| Calculation of Penalty points                                           |                        |
|-------------------------------------------------------------------------|------------------------|
| Parameter                                                               | Penalty points         |
| <b>1. Yield</b>                                                         | $(100 - 85) / 2 = 7.5$ |
| <b>2. Price of allyl chloride</b><br>(to obtain 10 mmol of end product) |                        |
| Inexpensive (< \$10)                                                    | 0                      |
| Expensive (> \$10 and < \$50)                                           | 0                      |
| Very expensive (> \$50)                                                 | 5                      |
| <b>3. Safety</b>                                                        |                        |
| N (dangerous for environment)                                           | 0                      |
| T (toxic)                                                               | 5                      |
| F (highly flammable)                                                    | 0                      |
| E (explosive)                                                           | 0                      |
| F+ (extremely flammable)                                                | 0                      |
| T+ (extremely toxic)                                                    | 0                      |
| <b>4. Technical setup</b>                                               |                        |
| <b>5. Temperature/time</b>                                              |                        |
| <b>6. Workup and purification</b>                                       |                        |
| <b>Total</b>                                                            | <b>17.5</b>            |

\*The EcoScale has been represented as a relative EcoScale, wherein the common parameters (Technical setup, Temperature/time, workup, and Purification) have been excluded while calculating the penalty points as they will be the same in all the cases.

## Calculation of Green metrics for Diethyl allyl phosphate ('in-water' under Ni-catalysis)

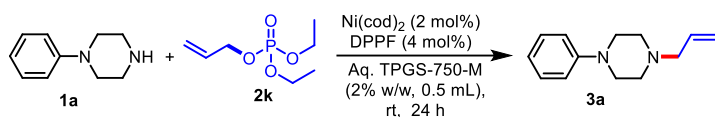

| Entities  | Molecular mass | Quantity used |
|-----------|----------------|---------------|
| <b>1a</b> | 162.23         | 32.44 mg      |
| <b>2h</b> | 194.17         | 58.25 mg      |
| <b>3a</b> | 202.14         | 33.91 mg      |

**Atom economy**      Molecular mass of desired product / Molecular mass of all reactant X 100  
 $202.14 / 162.23 + 194.17 \times 100 = 56.71\%$

**Atom efficiency**      % Yield of desired product X % Atom economy / 100  
 $84 \times 56.71 / 100 = 47.63\%$

**RME**      mass of desired product / total mass of reactants X 100  
 $33.91 / 90.65 \times 100 = 37.40\%$

**E-factor**      Amount of organic waste (mg) / Amount of product (mg)  
 (Total reaction mixture (mg) – Amount of product (mg)) / Amount of product (mg)  
 $(90.65 - 33.91) / 33.91 = 56.74 / 33.91 = 1.6$

**\*Relative EcoScale**      100 – sum of individual penalties  
 $100 - 18 = 82$

| Calculation of Penalty points                                           |                      |
|-------------------------------------------------------------------------|----------------------|
| Parameter                                                               | Penalty points       |
| <b>1. Yield</b>                                                         | $(100 - 84) / 2 = 8$ |
| <b>2. Price of allyl chloride</b><br>(to obtain 10 mmol of end product) |                      |
| Inexpensive (< \$10)                                                    | 0                    |
| Expensive (> \$10 and < \$50)                                           | 0                    |
| Very expensive (> \$50)                                                 | 5                    |
| <b>3. Safety</b>                                                        |                      |
| N (dangerous for environment)                                           | 0                    |
| T (toxic)                                                               | 5                    |
| F (highly flammable)                                                    | 0                    |
| E (explosive)                                                           | 0                    |
| F+ (extremely flammable)                                                | 0                    |
| T+ (extremely toxic)                                                    | 0                    |
| <b>4. Technical setup</b>                                               |                      |
| <b>5. Temperature/time</b>                                              |                      |
| <b>6. Workup and purification</b>                                       |                      |
| <b>Total</b>                                                            | <b>18</b>            |

\*The EcoScale has been represented as a relative EcoScale, wherein the common parameters (Technical setup, Temperature/time, workup, and Purification) have been excluded while calculating the penalty points as they will be the same in all the cases.

## Calculation of Green metrics for allyl imidate ('in-water' under Ni-catalysis)

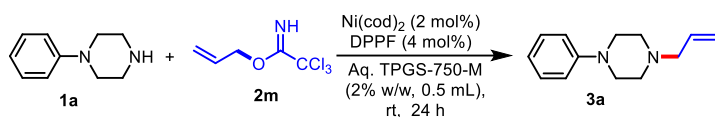

| Entities  | Molecular mass | Quantity used |
|-----------|----------------|---------------|
| <b>1a</b> | 162.23         | 32.44 mg      |
| <b>2m</b> | 202.47         | 60.74 mg      |
| <b>3a</b> | 202.14         | 23.81 mg      |

**Atom economy**      Molecular mass of desired product / Molecular mass of all reactant X 100  
 $202.14 / 162.23 + 202.47 \times 100 = 55.42\%$

**Atom efficiency**      % Yield of desired product X % Atom economy / 100  
 $59 \times 55.42 / 100 = 32.69\%$

**RME**      mass of desired product / total mass of reactants X 100  
 $23.81 / 93.14 \times 100 = 25.56\%$

**E-factor**      Amount of organic waste (mg) / Amount of product (mg)  
 (Total reaction mixture (mg) – Amount of product (mg)) / Amount of product (mg)  
 $(93.14 - 23.81) / 23.81 = 69.33 / 23.81 = 2.9$

**\*Relative EcoScale**      100 – sum of individual penalties  
 $100 - 40.5 = 59.5$

| Calculation of Penalty points                                           |                         |
|-------------------------------------------------------------------------|-------------------------|
| Parameter                                                               | Penalty points          |
| <b>1. Yield</b>                                                         | $(100 - 59) / 2 = 20.5$ |
| <b>2. Price of allyl chloride</b><br>(to obtain 10 mmol of end product) |                         |
| Inexpensive (< \$10)                                                    | 0                       |
| Expensive (> \$10 and < \$50)                                           | 0                       |
| Very expensive (> \$50)                                                 | 5                       |
| <b>3. Safety</b>                                                        |                         |
| N (dangerous for environment)                                           | 0                       |
| T (toxic)                                                               | 5                       |
| F (highly flammable)                                                    | 0                       |
| E (explosive)                                                           | 10                      |
| F+ (extremely flammable)                                                | 0                       |
| T+ (extremely toxic)                                                    | 0                       |
| <b>4. Technical setup</b>                                               |                         |
| <b>5. Temperature/time</b>                                              |                         |
| <b>6. Workup and purification</b>                                       |                         |
| <b>Total</b>                                                            | <b>40.5</b>             |

\*The EcoScale has been represented as a relative EcoScale, wherein the common parameters (Technical setup, Temperature/time, workup, and Purification) have been excluded while calculating the penalty points as they will be the same in all the cases.

## Calculation of Green metrics for allyl phenyl ether ('in-water' under Ni-catalysis)

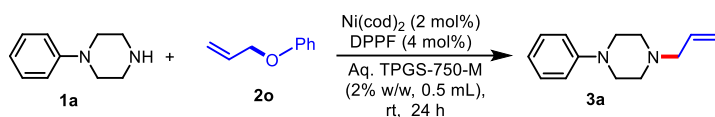

| Entities  | Molecular mass | Quantity used |
|-----------|----------------|---------------|
| <b>1a</b> | 162.23         | 32.44 mg      |
| <b>2o</b> | 134.18         | 40.25 mg      |
| <b>3a</b> | 202.14         | 32.69 mg      |

**Atom economy**      Molecular mass of desired product / Molecular mass of all reactant X 100  
 $202.14 / 162.23 + 134.18 \times 100 = 68.19\%$

**Atom efficiency**      % Yield of desired product X % Atom economy / 100  
 $81 \times 68.19 / 100 = 55.23\%$

**RME**      mass of desired product / total mass of reactants X 100  
 $32.69 / 72.65 \times 100 = 44.99\%$

**E-factor**      Amount of organic waste (mg) / Amount of product (mg)  
 (Total reaction mixture (mg) – Amount of product (mg)) / Amount of product (mg)  
 $(72.65 - 32.69) / 32.69 = 39.96 / 32.69 = 1.2$

**\*Relative EcoScale**      100 – sum of individual penalties  
 $100 - 29.5 = 70.5$

| Calculation of Penalty points                                           |                        |
|-------------------------------------------------------------------------|------------------------|
| Parameter                                                               | Penalty points         |
| <b>1. Yield</b>                                                         | $(100 - 81) / 2 = 9.5$ |
| <b>2. Price of allyl chloride</b><br>(to obtain 10 mmol of end product) |                        |
| Inexpensive (< \$10)                                                    | 0                      |
| Expensive (> \$10 and < \$50)                                           | 0                      |
| Very expensive (> \$50)                                                 | 5                      |
| <b>3. Safety</b>                                                        |                        |
| N (dangerous for environment)                                           | 0                      |
| T (toxic)                                                               | 0                      |
| F (highly flammable)                                                    | 5                      |
| E (explosive)                                                           | 10                     |
| F+ (extremely flammable)                                                | 0                      |
| T+ (extremely toxic)                                                    | 0                      |
| <b>4. Technical setup</b>                                               |                        |
| <b>5. Temperature/time</b>                                              |                        |
| <b>6. Workup and purification</b>                                       |                        |
| <b>Total</b>                                                            | <b>29.5</b>            |

\*The EcoScale has been represented as a relative EcoScale, wherein the common parameters (Technical setup, Temperature/time, workup, and Purification) have been excluded while calculating the penalty points as they will be the same in all the cases.

## Calculation of Green metrics for glycidyl ether ('in-water' under Ni-catalysis)

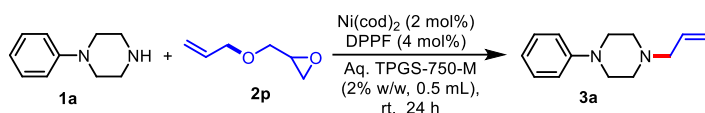

| Entities  | Molecular mass | Quantity used |
|-----------|----------------|---------------|
| <b>1a</b> | 162.23         | 32.44 mg      |
| <b>2p</b> | 114.14         | 34.24 mg      |
| <b>3a</b> | 202.14         | 23.01 mg      |

**Atom economy**      Molecular mass of desired product / Molecular mass of all reactant **X** 100  
 $202.14 / 162.23 + 114.14 \times 100 = 73.14\%$

**Atom efficiency**      % Yield of desired product **X** % Atom economy / 100  
 $57 \times 73.14 / 100 = 41.68\%$

**RME**      mass of desired product / total mass of reactants **X** 100  
 $23.01 / 66.64 \times 100 = 34.52\%$

**E-factor**      Amount of organic waste (mg) / Amount of product (mg)  
 (Total reaction mixture (mg) – Amount of product (mg)) / Amount of product (mg)  
 $(66.64 - 23.01) / 23.01 = 43.63 / 23.01 = 1.8$

**\*Relative EcoScale**      100 – sum of individual penalties  
 $100 - 36.5 = 63.5$

| Calculation of Penalty points                                           |                         |
|-------------------------------------------------------------------------|-------------------------|
| Parameter                                                               | Penalty points          |
| <b>1. Yield</b>                                                         | $(100 - 57) / 2 = 21.5$ |
| <b>2. Price of allyl chloride</b><br>(to obtain 10 mmol of end product) |                         |
| Inexpensive (< \$10)                                                    | 0                       |
| Expensive (> \$10 and < \$50)                                           | 0                       |
| Very expensive (> \$50)                                                 | 5                       |
| <b>3. Safety</b>                                                        |                         |
| N (dangerous for environment)                                           | 0                       |
| T (toxic)                                                               | 5                       |
| F (highly flammable)                                                    | 5                       |
| E (explosive)                                                           | 0                       |
| F+ (extremely flammable)                                                | 0                       |
| T+ (extremely toxic)                                                    | 0                       |
| <b>4. Technical setup</b>                                               |                         |
| <b>5. Temperature/time</b>                                              |                         |
| <b>6. Workup and purification</b>                                       |                         |
| <b>Total</b>                                                            | <b>36.5</b>             |

\*The EcoScale has been represented as a relative EcoScale, wherein the common parameters (Technical setup, Temperature/time, workup, and Purification) have been excluded while calculating the penalty points as they will be the same in all the cases.



## Calculation of Green metrics for *N*-Allylmethylamine ('in-water' under Ni-catalysis)

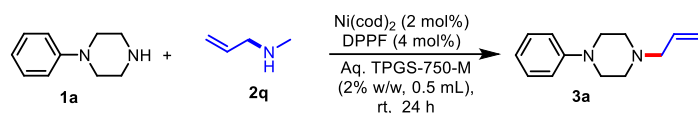

| Entities  | Molecular mass | Quantity used |
|-----------|----------------|---------------|
| <b>1a</b> | 162.23         | 32.44 mg      |
| <b>2q</b> | 71.12          | 21.33 mg      |
| <b>3a</b> | 202.14         | 30.68 mg      |

**Atom economy**      Molecular mass of desired product / Molecular mass of all reactant **X** 100  
 $202.14 / 162.23 + 71.12 \times 100 = 86.60\%$

**Atom efficiency**      % Yield of desired product **X** % Atom economy / 100  
 $76 \times 86.60 / 100 = 65.81\%$

**RME**      mass of desired product / total mass of reactants **X** 100  
 $30.68 / 53.73 \times 100 = 57.10\%$

**E-factor**      Amount of organic waste (mg) / Amount of product (mg)  
 (Total reaction mixture (mg) – Amount of product (mg)) / Amount of product (mg)  
 $(53.73 - 30.68) / 30.68 = 23.05 / 30.68 = 0.7$

**\*Relative EcoScale**      100 – sum of individual penalties  
 $100 - 27 = 73$

| Calculation of Penalty points                                           |                       |
|-------------------------------------------------------------------------|-----------------------|
| Parameter                                                               | Penalty points        |
| <b>1. Yield</b>                                                         | $(100 - 76) / 2 = 12$ |
| <b>2. Price of allyl chloride</b><br>(to obtain 10 mmol of end product) |                       |
| Inexpensive (< \$10)                                                    | 0                     |
| Expensive (> \$10 and < \$50)                                           | 0                     |
| Very expensive (> \$50)                                                 | 5                     |
| <b>3. Safety</b>                                                        |                       |
| N (dangerous for environment)                                           | 0                     |
| T (toxic)                                                               | 5                     |
| F (highly flammable)                                                    | 5                     |
| E (explosive)                                                           | 0                     |
| F+ (extremely flammable)                                                | 0                     |
| T+ (extremely toxic)                                                    | 0                     |
| <b>4. Technical setup</b>                                               |                       |
| <b>5. Temperature/time</b>                                              |                       |
| <b>6. Workup and purification</b>                                       |                       |
| <b>Total</b>                                                            | <b>27</b>             |

\*The EcoScale has been represented as a relative EcoScale, wherein the common parameters (Technical setup, Temperature/time, workup, and Purification) have been excluded while calculating the penalty points as they will be the same in all the cases.

## Calculation of Green metrics for allyl isocyanate ('in-water' under Ni-catalysis)

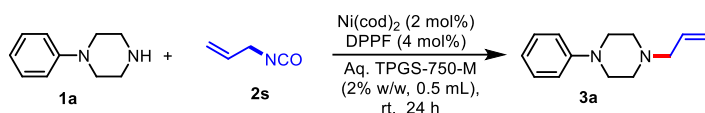

| Entities | Molecular mass | Quantity used |
|----------|----------------|---------------|
| 1a       | 162.23         | 32.44 mg      |
| 2s       | 83.09          | 24.92 mg      |
| 3a       | 202.14         | 8.47 mg       |

**Atom economy** Molecular mass of desired product / Molecular mass of all reactant X 100  
 $202.14 / 162.23 + 83.09 \times 100 = 82.39\%$

**Atom efficiency** % Yield of desired product X % Atom economy / 100  
 $21 \times 82.39 / 100 = 17.30\%$

**RME** mass of desired product / total mass of reactants X 100  
 $8.47 / 57.32 \times 100 = 14.77\%$

**E-factor** Amount of organic waste (mg) / Amount of product (mg)  
 (Total reaction mixture (mg) – Amount of product (mg)) / Amount of product (mg)  
 $(57.32 - 8.47) / 8.47 = 48.85 / 8.47 = 5.7$

**\*Relative EcoScale** 100 – sum of individual penalties  
 $100 - 54.5 = 45.5$

| Calculation of Penalty points                                           |                   |
|-------------------------------------------------------------------------|-------------------|
| Parameter                                                               | Penalty points    |
| <b>1. Yield</b>                                                         | (100–21)/2 = 39.5 |
| <b>2. Price of allyl chloride</b><br>(to obtain 10 mmol of end product) |                   |
| Inexpensive (< \$10)                                                    | 0                 |
| Expensive (> \$10 and < \$50)                                           | 0                 |
| Very expensive (> \$50)                                                 | 5                 |
| <b>3. Safety</b>                                                        |                   |
| N (dangerous for environment)                                           | 0                 |
| T (toxic)                                                               | 5                 |
| F (highly flammable)                                                    | 5                 |
| E (explosive)                                                           | 0                 |
| F+ (extremely flammable)                                                | 0                 |
| T+ (extremely toxic)                                                    | 0                 |
| <b>4. Technical setup</b>                                               |                   |
| <b>5. Temperature/time</b>                                              |                   |
| <b>6. Workup and purification</b>                                       |                   |
| <b>Total</b>                                                            | <b>54.5</b>       |

\*The EcoScale has been represented as a relative EcoScale, wherein the common parameters (Technical setup, Temperature/time, workup, and Purification) have been excluded while calculating the penalty points as they will be the same in all the cases.

## Calculation of Green metrics for allyl phenyl sulfone ('in-water' under Ni-catalysis)

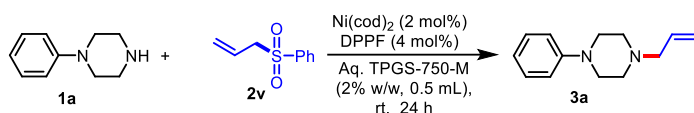

| Entities | Molecular mass | Quantity used |
|----------|----------------|---------------|
| 1a       | 162.23         | 32.44 mg      |
| 2v       | 182.24         | 54.67 mg      |
| 3a       | 202.14         | 25.83 mg      |

**Atom economy** Molecular mass of desired product / Molecular mass of all reactant X 100  
 $202.14 / 162.23 + 182.24 \times 100 = 58.68\%$

**Atom efficiency** % Yield of desired product X % Atom economy / 100  
 $64 \times 58.68 / 100 = 37.55\%$

**RME** mass of desired product / total mass of reactants X 100  
 $25.83 / 87.07 \times 100 = 29.66\%$

**E-factor** Amount of organic waste (mg) / Amount of product (mg)  
 (Total reaction mixture (mg) – Amount of product (mg)) / Amount of product (mg)  
 $(87.07 - 25.83) / 25.83 = 61.24 / 25.83 = 2.3$

**\*Relative EcoScale** 100 – sum of individual penalties  
 $100 - 28 = 72$

| Calculation of Penalty points                                           |                       |
|-------------------------------------------------------------------------|-----------------------|
| Parameter                                                               | Penalty points        |
| <b>1. Yield</b>                                                         | $(100 - 64) / 2 = 18$ |
| <b>2. Price of allyl chloride</b><br>(to obtain 10 mmol of end product) |                       |
| Inexpensive (< \$10)                                                    | 0                     |
| Expensive (> \$10 and < \$50)                                           | 0                     |
| Very expensive (> \$50)                                                 | 5                     |
| <b>3. Safety</b>                                                        |                       |
| N (dangerous for environment)                                           | 0                     |
| T (toxic)                                                               | 5                     |
| F (highly flammable)                                                    | 0                     |
| E (explosive)                                                           | 0                     |
| F+ (extremely flammable)                                                | 0                     |
| T+ (extremely toxic)                                                    | 0                     |
| <b>4. Technical setup</b>                                               |                       |
| <b>5. Temperature/time</b>                                              |                       |
| <b>6. Workup and purification</b>                                       |                       |
| <b>Total</b>                                                            | <b>28</b>             |

\*The EcoScale has been represented as a relative EcoScale, wherein the common parameters (Technical setup, Temperature/time, workup, and Purification) have been excluded while calculating the penalty points as they will be the same in all the cases.

## 7. Demonstration of 'in-water' allylic amination using Ni(0) pre-catalyst

### 7.1. Evaluation of Ni(0)-precatalysts, ligands, and optimisation study.

| Evaluation of different Ni(0) pre-catalyst                                                                                                                                                                                                                                                                                                                                                                                                                                                                                  |                           |  |
|-----------------------------------------------------------------------------------------------------------------------------------------------------------------------------------------------------------------------------------------------------------------------------------------------------------------------------------------------------------------------------------------------------------------------------------------------------------------------------------------------------------------------------|---------------------------|--|
| <div><div><div><div><div>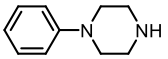</div><div>1a</div></div><div><div></div><div>2d</div></div></div><div><div><div>Ni(II) (2 mol%)<br/>DPPF (4 mol%)<br/>Zn (2 equiv)<br/>Aq. TPGS-750-M<br/>(2% w/w, 0.5 mL),<br/>rt, 24 h</div><div></div></div><div>3a</div></div></div></div> |                           |  |
| Ni(0) precatalyst                                                                                                                                                                                                                                                                                                                                                                                                                                                                                                           | 3a (% Yield) <sup>a</sup> |  |
| NiF <sub>2</sub>                                                                                                                                                                                                                                                                                                                                                                                                                                                                                                            | 14                        |  |
| NiCl <sub>2</sub>                                                                                                                                                                                                                                                                                                                                                                                                                                                                                                           | 21                        |  |
| NiBr <sub>2</sub>                                                                                                                                                                                                                                                                                                                                                                                                                                                                                                           | 42                        |  |
| NiCl <sub>2</sub> glyme                                                                                                                                                                                                                                                                                                                                                                                                                                                                                                     | 29                        |  |
| Ni(acac) <sub>2</sub>                                                                                                                                                                                                                                                                                                                                                                                                                                                                                                       | 25                        |  |
| None                                                                                                                                                                                                                                                                                                                                                                                                                                                                                                                        | 0 <sup>b</sup>            |  |

Conditions: **1a** is treated with **2d** in presence of different Ni(II) catalysts and DPPF with 2 equiv. of Zn powder in aq. TPGS-750-M micelles. <sup>a</sup>Yield represents the isolated and purified yield of **3a**.  
<sup>b</sup>Starting **1a** was found intact.

| Optimization of reductants and their molar equivalent                                                                                                                                                                                                                                                                                                                                                                                                                                                                                          |                           |  |
|------------------------------------------------------------------------------------------------------------------------------------------------------------------------------------------------------------------------------------------------------------------------------------------------------------------------------------------------------------------------------------------------------------------------------------------------------------------------------------------------------------------------------------------------|---------------------------|--|
| <div><div><div><div><div></div><div>1a</div></div><div><div></div><div>2d</div></div></div><div><div><div>NiBr<sub>2</sub> (2 mol%)<br/>DPPF (4 mol%)<br/>Reductant (x mol%)<br/>Aq. TPGS-750-M<br/>(2% w/w, 0.5 mL),<br/>rt, 24 h</div><div></div></div><div>3a</div></div></div></div> |                           |  |
| Reductant                                                                                                                                                                                                                                                                                                                                                                                                                                                                                                                                      | 3a (% Yield) <sup>a</sup> |  |
| Zn dust (2 equiv)                                                                                                                                                                                                                                                                                                                                                                                                                                                                                                                              | 42                        |  |
| Zn dust (1 equiv)                                                                                                                                                                                                                                                                                                                                                                                                                                                                                                                              | 28                        |  |
| Zn dust (0.5 equiv)                                                                                                                                                                                                                                                                                                                                                                                                                                                                                                                            | 15                        |  |
| Mn dust (2 equiv)                                                                                                                                                                                                                                                                                                                                                                                                                                                                                                                              | Traces <sup>b</sup>       |  |
| nano-Zn (0.5 equiv)                                                                                                                                                                                                                                                                                                                                                                                                                                                                                                                            | 67                        |  |
| nano-Zn (0.3 equiv)                                                                                                                                                                                                                                                                                                                                                                                                                                                                                                                            | 68                        |  |
| nano-Zn (0.2 equiv)                                                                                                                                                                                                                                                                                                                                                                                                                                                                                                                            | 67                        |  |
| nano-Zn (0.1 equiv)                                                                                                                                                                                                                                                                                                                                                                                                                                                                                                                            | Traces <sup>b</sup>       |  |

Conditions: **1a** is treated with **2d** in presence of catalytic NiBr<sub>2</sub> and DPPF under different reaction conditions in aq. TPGS-750-M micelles. <sup>a</sup>Yield represents the isolated and purified yield of **3a**.  
<sup>b</sup>Starting **1a** was found intact.

| Evaluation of different micellar media                                                                                                                                                                                                                                                                                                                                                                                                                                                                                                           |                           |  |
|--------------------------------------------------------------------------------------------------------------------------------------------------------------------------------------------------------------------------------------------------------------------------------------------------------------------------------------------------------------------------------------------------------------------------------------------------------------------------------------------------------------------------------------------------|---------------------------|--|
| <div><div><div><div><div></div><div>1a</div></div><div><div></div><div>2d</div></div></div><div><div><div>NiBr<sub>2</sub> (2 mol%)<br/>DPPF (4 mol%)<br/>nano Zn (0.2 equiv)<br/>Aq. Micelles<br/>(2% w/w, 0.5 mL),<br/>rt, 24 h</div><div></div></div><div>3a</div></div></div></div> |                           |  |
| Aq. Micelles (2 % w/w)                                                                                                                                                                                                                                                                                                                                                                                                                                                                                                                           | 3a (% Yield) <sup>a</sup> |  |
| TPGS-750 M                                                                                                                                                                                                                                                                                                                                                                                                                                                                                                                                       | 67                        |  |
| SPGS-550 M                                                                                                                                                                                                                                                                                                                                                                                                                                                                                                                                       | 10                        |  |
| PTS                                                                                                                                                                                                                                                                                                                                                                                                                                                                                                                                              | 81                        |  |
| HPMC                                                                                                                                                                                                                                                                                                                                                                                                                                                                                                                                             | Traces <sup>b</sup>       |  |
| SDS                                                                                                                                                                                                                                                                                                                                                                                                                                                                                                                                              | 18                        |  |
| SDOSS                                                                                                                                                                                                                                                                                                                                                                                                                                                                                                                                            | 46                        |  |
| Tween-40                                                                                                                                                                                                                                                                                                                                                                                                                                                                                                                                         | 36                        |  |
| SPAN-40                                                                                                                                                                                                                                                                                                                                                                                                                                                                                                                                          | 11                        |  |
| Triton X-100                                                                                                                                                                                                                                                                                                                                                                                                                                                                                                                                     | Traces <sup>b</sup>       |  |
| none                                                                                                                                                                                                                                                                                                                                                                                                                                                                                                                                             | Traces <sup>b</sup>       |  |

Conditions: **1a** is treated with **2d** in presence of catalytic NiBr<sub>2</sub> and DPPF with nano Zn (20 mol%) in different aq. micelles. <sup>a</sup>Yield represents the isolated and purified yield of **3a**. <sup>b</sup>Starting **1a** was found intact.

#### Optimization of amount of NiBr<sub>2</sub> and DPPF ligand

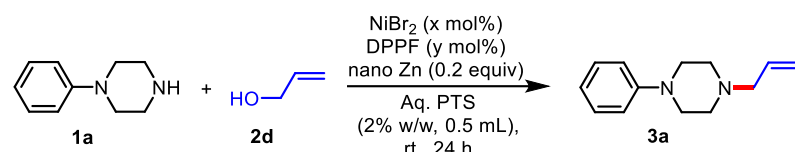

| NiBr <sub>2</sub> (mol%) | <b>3a</b> (%Yield) <sup>a</sup> |
|--------------------------|---------------------------------|
| 2                        | 81                              |
| 1                        | 67                              |
| 0.5                      | 55                              |

  

| DPPF (mol%) | <b>3a</b> (%Yield) <sup>a</sup> |
|-------------|---------------------------------|
| 4           | 81                              |
| 2           | 61                              |
| 0.5         | Traces <sup>b</sup>             |

Conditions: **1a** is treated with **2d** in presence of different catalytic amount of NiBr<sub>2</sub> and DPPF with nano Zn (20 mol%) in different aq. micelles. <sup>a</sup>Yield represents the isolated and purified yield of **3a**. <sup>b</sup>Starting **1a** was found intact.

#### Re-evaluation of different ligands under optimized conditions.

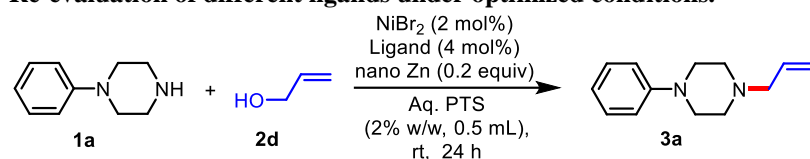

| Ligand                             | <b>3a</b> (%Yield) <sup>a</sup> |
|------------------------------------|---------------------------------|
| PPh <sub>3</sub>                   | 18                              |
| P(o-tol) <sub>3</sub>              | 0 <sup>b</sup>                  |
| PCy <sub>3</sub>                   | 0 <sup>b</sup>                  |
| DPPM                               | 0 <sup>b</sup>                  |
| DPPP                               | 0 <sup>b</sup>                  |
| XPhos                              | 0 <sup>b</sup>                  |
| RuPhos                             | 0 <sup>b</sup>                  |
| XantPhos                           | 43                              |
| DPEPhos                            | 66                              |
| 4,4'-diMeO-2,2'-bipy               | 0 <sup>b</sup>                  |
| 4,4'-di- <sup>t</sup> Bu-2,2'-bpyr | 0 <sup>b</sup>                  |
| 5,5'-CF <sub>3</sub> ,2,2'-bipy    | 0 <sup>b</sup>                  |
| BPhen                              | 0 <sup>b</sup>                  |
| SIPr•HCl                           | 0 <sup>b</sup>                  |
| SIPr•HBF <sub>4</sub>              | 0 <sup>b</sup>                  |
| SIMes•HCl                          | 0 <sup>b</sup>                  |
| IAd•HBF <sub>4</sub>               | 0 <sup>b</sup>                  |

Conditions: **1a** is treated with **2d** under optimized conditions in presence of different ligand (4 mol%). <sup>a</sup>Yield represents the isolated and purified yield of **3a**. <sup>b</sup>Starting **1a** was found intact.

## Structure of surfactants used in study.

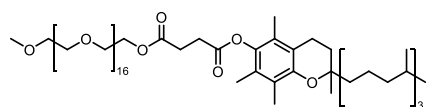

DL- $\alpha$ -Tocopherol methoxypolyethylene glycol succinate  
(**TPGS-750M**)

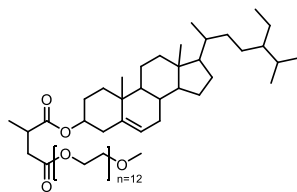

$\beta$ -sitosterol methoxypolyethyleneglycol succinate  
(**SPGS-550M**)

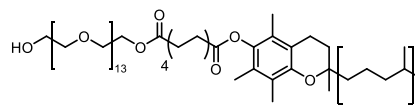

Polyoxyethanyl- $\alpha$ -tocopheryl sebacate  
(**PTS**)

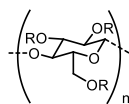

R = H, CH<sub>3</sub>, CH<sub>2</sub>CH(OH)CH<sub>3</sub>

Hydroxypropylmethyl cellulose  
(**HMPC**)

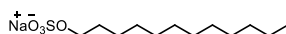

Sodium dodecyl sulfate  
(**SDS**)

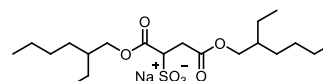

Dioctyl Sodium Sulfosuccinate  
(**SDOSS**)

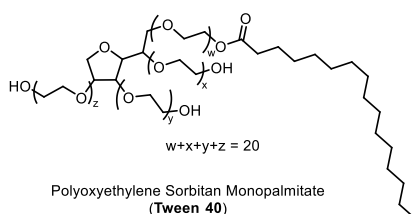

Polyoxyethylene Sorbitan Monopalmitate  
(**Tween 40**)

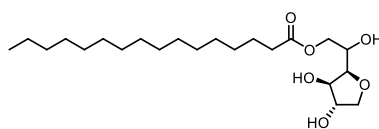

Sorbitan monopalmitate  
(**SPAN-40**)

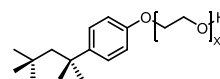

2-[4-(2,4,4-trimethylpentan-2-yl)phenoxy]ethanol  
(**Triton X-100**)

### Representative experimental procedure for the N-allylation using allyl alcohols in the presence of Ni (0) pre-catalyst in aqueous micellar

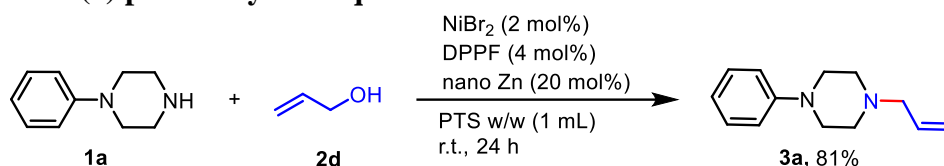

To a well clean tube equipped with a stir bar, NiBr<sub>2</sub> (0.87 mg, 0.004 mmol, 2 mol%), DPPF (4.4 mg, 0.008 mmol, 4 mol%), nano Zn (2.6 mg, 0.04 mmol, 20 mol%) 1-phenylpiperazine **1a** (32.4 mg, 31.5  $\mu$ L, 0.2 mmol), allyl alcohol **2d** (17.4 mg, 20.4  $\mu$ L, 0.3 mmol, 1.5 equiv), and aqueous PTS (2% w/w, 1 mL) were added. The resultant mixture was stirred at room temperature for 24 h. After the stipulated time period, the reaction mixture was diluted with EtOAc (2 X 0.5 mL) and vortexed. The supernatant organic layers containing product and other organic residue were dried over anhyd. Na<sub>2</sub>SO<sub>4</sub> and concentrated under reduced pressure. The crude products were adsorbed on silica gel and passed through the column (eluent: Hexane/EtOAc) to get analytically pure product **3a** (81%) as a pale-yellow liquid.

### 7.2. Scale up study using Ni (0) pre-catalyst in aqueous micellar

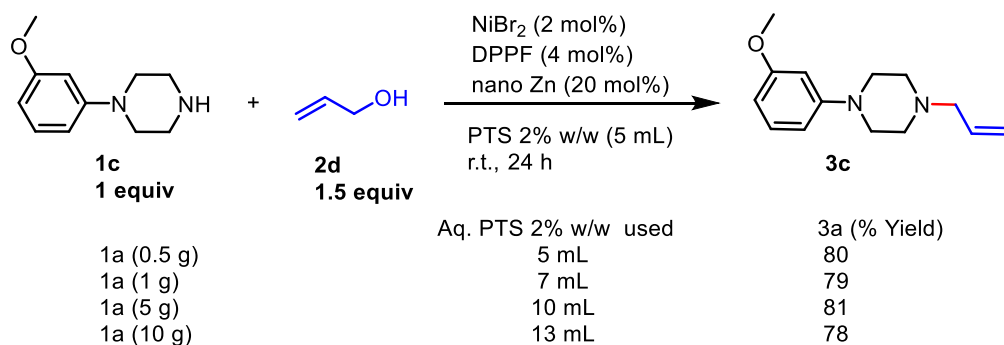

### Representative procedure (10.0 Gram scale)

To a well clean tube equipped with a stir bar, NiBr<sub>2</sub> (269.4 mg, 1.2 mmol, 2 mol%), DPPF (1.36 g, 2.4 mmol, 4 mol%), nano Zn (806.0 mg, 12.32 mmol, 20 mol%), 1-phenylpiperazine **1a** (10.0 g, 9.4 mL, 61.6 mmol), allyl alcohol **2d** (5.3 g, 6.29 mL, 92.4 mmol, 1.5 equiv), and aqueous PTS (2% w/w, 13 mL) were added. The resultant mixture was stirred at room temperature for 24 h. After the stipulated time period, the reaction mixture was diluted with EtOAc (2 X 100 mL) and vortexed. The supernatant organic layers containing product and other organic residue were dried over anhyd. Na<sub>2</sub>SO<sub>4</sub> and concentrated under reduced pressure. The crude products were adsorbed on silica gel and passed through the column (eluent: Hexane/EtOAc) to get analytically pure product **3c** (9.72 g, 78%) as a pale-yellow liquid.

## 7.2. ICP-MS study

The ICH categorized the various elemental impurities in four different classifications to facilitate decisions during the risk assessment process. Nickel falls under Class 2a with 200 mg/L (for oral application) and set according to the permitted daily exposure limits (PDE).

| Sample      | Ni (ppm) |
|-------------|----------|
| MCSHL-ICPMS | 0.040285 |



### 7.3. Recyclability study under Ni (0) pre-catalyst in aqueous micellar

Procedure: To a well cleaned and dried seal tube equipped with a stir bar, NiBr<sub>2</sub> (4.3 mg, 0.02 mmol, 2 mol%), DPPF (22.1 mg, 0.04 mmol, 4 mol%), 1-(3-methoxyphenyl)piperazine **1c** (192.2 mg, 168.6  $\mu$ L, 1 mmol), allyl alcohol **2d** (87.12 mg, 102.01  $\mu$ L, 1.5 mmol, 1.5 equiv), and aqueous PTS (2% w/w, 5 mL) were added. The resultant mixture was stirred at room temperature for 24 h. After the stipulated time period, the reaction mixture was diluted with EtOAc (3 X 5 mL) and vortexed. The supernatant organic layers containing product and other organic residue were dried over anhyd. Na<sub>2</sub>SO<sub>4</sub> and concentrated under reduced pressure. The crude products were adsorbed on silica gel and passed through the column (eluent: Hexane/EtOAc) to get analytically pure product **3c** (0.18 g, 81%) as a pale-yellow liquid. To the remaining aqueous layer same protocol as mentioned above was repeated except addition of fresh aqueous PTS (2% w/w), for product formation in the next consecutive cycles as summarized below.

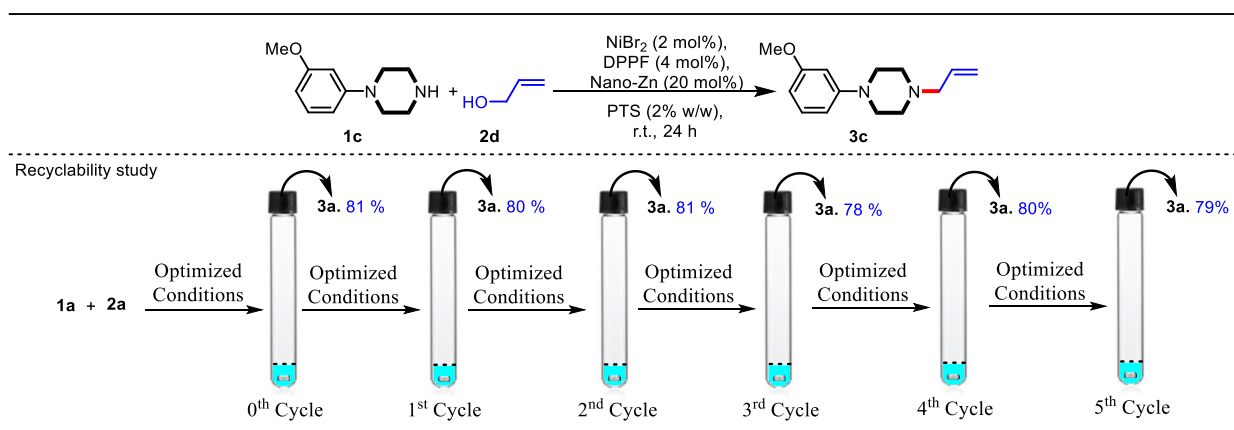

#### 7.4. Determination of Average particle size and Particle Distribution Index (PDI) of PTS-derived micelles (0 cycle vs. 6<sup>th</sup> cycle) using the Zeta sizer

**Sample preparation:** About 0.5 mL of freshly prepared aqueous solutions (2% w/w) of PTS were pipetted out and diluted one time (1x) with miliQ water in microcentrifuge tube. This was further filtered through Fluoropore Membrane Filter (MF-Millipore™, 0.22 µm pore size, hydrophobic PTFE, 47 mm membrane). The filtrate collected were used as final sample. All the sample measurements were made at  $25 \pm 2$  °C in triplicate using disposable cuvette, and the results were analyzed using Zetasizer 633 nm and angle (173°). In a similar manner, recovered aqueous PTS (after 5<sup>th</sup> run) was analysed.

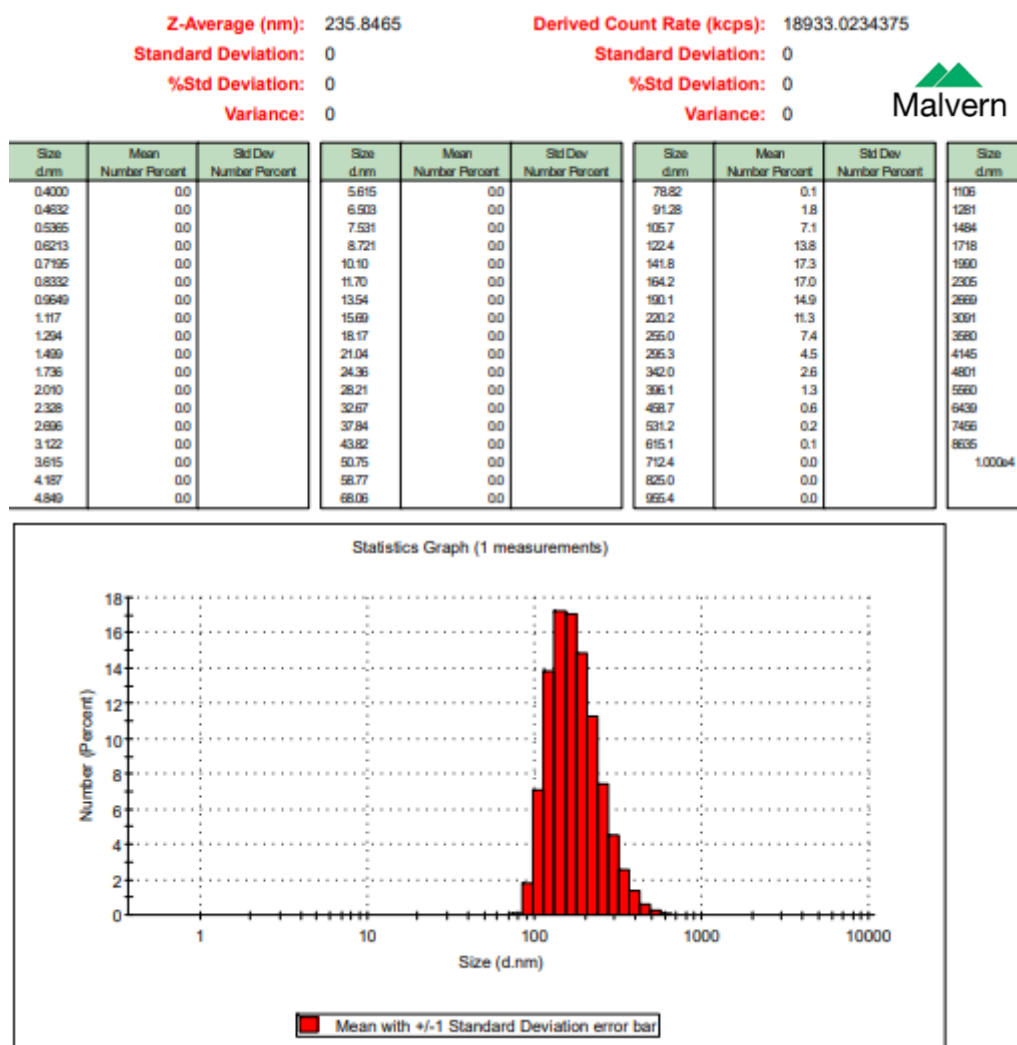

Fig S1. Zeta sizer analysis (Particle size distribution) of freshly prepared aq. PTS micelles (2% w/w)

**Z-Average (nm):** 1278.486  
**Standard Deviation:** 0  
**%Std Deviation:** 0  
**Variance:** 0

**Derived Count Rate (kcps):** 29459.0611979...  
**Standard Deviation:** 0  
**%Std Deviation:** 0  
**Variance:** 0

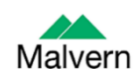

| Size d.nm | Mean Number Percent | Std Dev Number Percent | Size d.nm | Mean Number Percent | Std Dev Number Percent | Size d.nm | Mean Number Percent | Std Dev Number Percent | Size d.nm |
|-----------|---------------------|------------------------|-----------|---------------------|------------------------|-----------|---------------------|------------------------|-----------|
| 0.4000    | 0.0                 |                        | 5.615     | 0.0                 |                        | 78.82     | 16.7                |                        | 1106      |
| 0.4632    | 0.0                 |                        | 6.503     | 0.0                 |                        | 91.28     | 14.4                |                        | 1261      |
| 0.5365    | 0.0                 |                        | 7.531     | 0.0                 |                        | 105.7     | 15.6                |                        | 1484      |
| 0.6213    | 0.0                 |                        | 8.721     | 0.0                 |                        | 122.4     | 17.4                |                        | 1718      |
| 0.7195    | 0.0                 |                        | 10.10     | 0.0                 |                        | 141.8     | 14.7                |                        | 1990      |
| 0.8332    | 0.0                 |                        | 11.70     | 0.0                 |                        | 164.2     | 9.6                 |                        | 2305      |
| 0.9640    | 0.0                 |                        | 13.54     | 0.0                 |                        | 190.1     | 3.0                 |                        | 2669      |
| 1.117     | 0.0                 |                        | 15.69     | 0.0                 |                        | 220.2     | 0.2                 |                        | 3091      |
| 1.294     | 0.0                 |                        | 18.17     | 0.0                 |                        | 255.0     | 0.0                 |                        | 3580      |
| 1.489     | 0.0                 |                        | 21.04     | 0.0                 |                        | 295.3     | 0.0                 |                        | 4145      |
| 1.736     | 0.0                 |                        | 24.36     | 0.0                 |                        | 342.0     | 0.0                 |                        | 4801      |
| 2.010     | 0.0                 |                        | 28.21     | 0.0                 |                        | 395.1     | 0.0                 |                        | 5560      |
| 2.328     | 0.0                 |                        | 32.67     | 0.0                 |                        | 458.7     | 0.0                 |                        | 6439      |
| 2.696     | 0.0                 |                        | 37.84     | 0.0                 |                        | 531.2     | 0.0                 |                        | 7456      |
| 3.122     | 0.0                 |                        | 43.82     | 0.0                 |                        | 615.1     | 0.0                 |                        | 8635      |
| 3.615     | 0.0                 |                        | 50.75     | 0.0                 |                        | 712.4     | 0.0                 |                        |           |
| 4.187     | 0.0                 |                        | 58.77     | 0.0                 |                        | 825.0     | 0.0                 |                        |           |
| 4.849     | 0.0                 |                        | 68.06     | 8.3                 |                        | 955.4     | 0.0                 |                        |           |

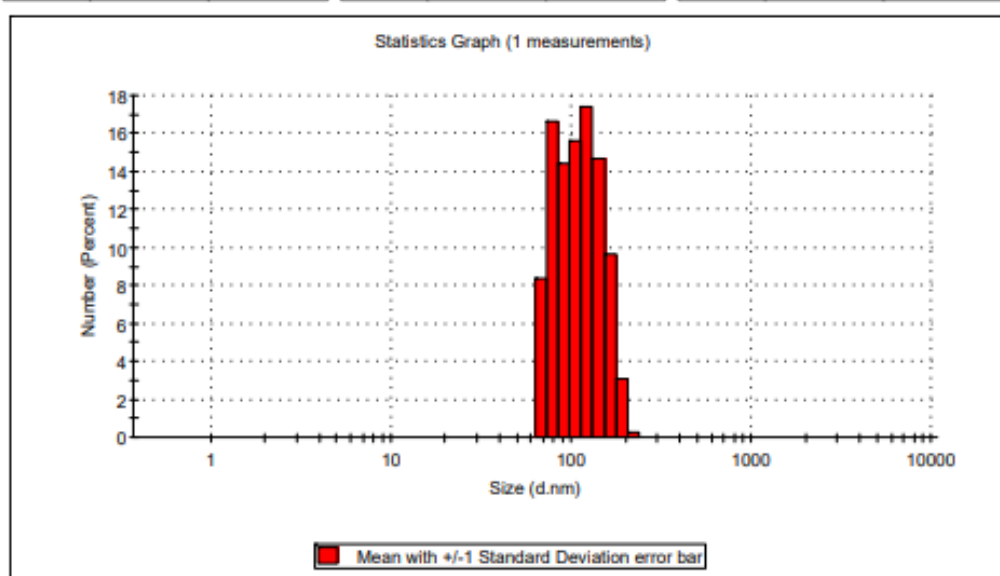

Fig S2. Zeta sizer analysis (Particle size distribution) of aq. PTS micelles (2% w/w) after 5<sup>th</sup> cycle.

## 7.5. Calculation of Green metrics for 1-(3-methoxyphenyl)piperazine ('in-water' under Ni-catalysis)

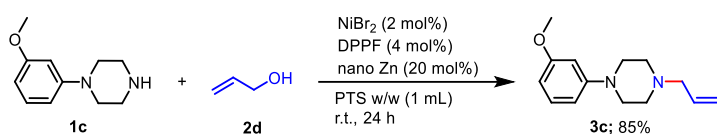

| Entities  | Molecular mass | Quantity used |
|-----------|----------------|---------------|
| <b>1a</b> | 192.12         | 38.42 mg      |
| <b>2d</b> | 58.08          | 17.4 mg       |
| <b>3a</b> | 232.15         | 39.49 mg      |

**Atom economy**      Molecular mass of desired product / Molecular mass of all reactant **X** 100  
 $232.15 / 192.12 + 58.08 \times 100 = 92.72\%$

**Atom efficiency**      % Yield of desired product **X** % Atom economy / 100  
 $85 \times 92.72 / 100 = 78.81\%$

**RME**      mass of desired product / total mass of reactants **X** 100  
 $39.49 / 55.82 \times 100 = 70.74\%$

**E-factor**      Amount of organic waste (mg) / Amount of product (mg)  
 (Total reaction mixture (mg) – Amount of product (mg)) / Amount of product (mg)  
 $(55.82 - 39.49) / 39.49 = 0.4$

**EcoScale**      100 – sum of individual penalties  
 $100 - 24 = 76$

| Calculation of Penalty points                                             |                        |
|---------------------------------------------------------------------------|------------------------|
| Parameter                                                                 | Penalty points         |
| <b>1. Yield</b>                                                           | $(100 - 85) / 2 = 7.5$ |
| <b>2. Price of reaction components</b> (to obtain 10 mmol of end product) |                        |
| Inexpensive (< \$10)                                                      | 0                      |
| Expensive (> \$10 and < \$50)                                             | 0                      |
| Very expensive (> \$50)                                                   | 5                      |
| <b>3. Safety</b>                                                          |                        |
| N (dangerous for environment)                                             | 0                      |
| T (toxic)                                                                 | 5                      |
| F (highly flammable)                                                      | 0                      |
| E (explosive)                                                             | 0                      |
| F+ (extremely flammable)                                                  | 0                      |
| T+ (extremely toxic)                                                      | 0                      |
| <b>4. Technical setup</b>                                                 |                        |
| Common setup                                                              | 0                      |
| Instruments for controlled addition of chemicals                          | 0                      |
| Unconventional activation technique                                       | 0                      |
| Pressure equipment, > 1 atm                                               | 0                      |
| Any additional special glassware                                          | 0                      |
| (Inert) gas atmosphere                                                    | 0                      |
| Glove box                                                                 | 0                      |

|                                    |           |
|------------------------------------|-----------|
| <b>5. Temperature/time</b>         |           |
| Room temperature, < 1 h            | 0         |
| Room temperature, < 24 h           | 1         |
| Heating, < 1 h                     | 0         |
| Heating, > 1 h                     | 0         |
| Cooling to 0°C                     | 0         |
| Cooling, < 0°C                     | 0         |
| <b>6. Workup and purification</b>  |           |
| None                               | 0         |
| Cooling to room temperature        | 0         |
| Adding solvent                     | 0         |
| Simple filtration                  | 0         |
| Removal of solvent with bp < 150°C | 0         |
| Crystallization and filtration     | 0         |
| Removal of solvent with bp > 150°C | 0         |
| Solid phase extraction             | 0         |
| Distillation                       | 0         |
| Sublimation                        | 0         |
| Liquid-liquid extraction           | 3         |
| Classical chromatography           | 10        |
| <b>Total points</b>                | <b>24</b> |

## 8. Spectroscopic characterization data

**1-Allyl-4-phenylpiperazine (3a):** Pale yellow liquid (32.80 mg, 81%); <sup>1</sup>H NMR (500 MHz, Chloroform-*d*) δ 7.32 – 7.28 (m, 2H), 6.96 (d, *J* = 7.7 Hz, 2H), 6.89 (t, *J* = 7.3 Hz, 1H), 5.9 (ddt, *J* = 16.8, 10.1, 6.6 Hz, 1H), 5.27 (dq, *J* = 17.2, 1.6 Hz, 1H), 5.24 – 5.21 (m, 1H), 3.26 – 3.24 (m, 4H), 3.10 (d, *J* = 6.7 Hz, 2H), 2.67 – 2.65 (m, 4H); <sup>13</sup>C NMR (125 MHz, Chloroform-*d*) δ 151.2, 134.6, 129.0, 119.6, 118.4, 116.0, 61.7, 52.9, 49.0; **HRMS** (ESI-TOF) *m/z*: [M + H]<sup>+</sup> Calculated for C<sub>13</sub>H<sub>19</sub>N<sub>2</sub><sup>+</sup> 203.1548 Found 203.1505.

**1-Allyl-4-(p-tolyl)piperazine (3b):** Pale yellow liquid (38.03 mg, 87%); <sup>1</sup>H NMR (500 MHz, Chloroform-*d*) δ 7.09 – 7.07 (m, 2H), 6.87 – 6.84 (m, 2H), 5.91 (ddt, *J* = 16.8, 10.1, 6.6 Hz, 1H), 5.26 – 5.18 (m, 2H), 3.18 – 3.16 (m, 4H), 3.07 (dt, *J* = 6.7, 1.3 Hz, 2H), 2.64 – 2.62 (m, 4H), 2.27 (s, 3H). <sup>13</sup>C NMR (125 MHz, Chloroform-*d*) δ 149.2, 134.7, 129.6, 129.2, 118.3, 116.4, 61.7, 53.1, 49.6, 20.4. **HRMS** (ESI-TOF) *m/z*: [M + H]<sup>+</sup> Calculated for C<sub>14</sub>H<sub>21</sub>N<sub>2</sub><sup>+</sup> 217.1699 Found 217.1705.

**1-Allyl-4-(3-methoxyphenyl)piperazine (3c):** Pale yellow liquid (39.49 mg, 85%); <sup>1</sup>H NMR (500 MHz, Chloroform-*d*) δ 7.17 (t, *J* = 8.2 Hz, 1H), 6.55 (ddd, *J* = 8.2, 2.3, 0.8 Hz, 1H), 6.47 (t, *J* = 2.4 Hz, 1H), 6.41 (ddd, *J* = 8.2, 2.4, 0.8 Hz, 1H), 5.90 (ddt, *J* = 16.8, 10.2, 6.6 Hz, 1H), 5.24 – 5.17 (m, 2H), 3.79 (s, 3H), 3.22 – 3.20 (m, 4H), 3.06 (dt, *J* = 6.7, 1.3 Hz, 2H), 2.61 – 2.59 (m, 4H); <sup>13</sup>C NMR (125 MHz, Chloroform-*d*) δ 160.5, 152.7, 134.8, 129.7, 118.3, 108.8, 104.3, 102.4, 61.8, 55.1, 53.0, 49.0; **HRMS** (ESI-TOF) *m/z*: [M + H]<sup>+</sup> Calculated for C<sub>14</sub>H<sub>21</sub>N<sub>2</sub>O<sup>+</sup> 233.1648 Found 233.1649.

**2-(4-Allylpiperazin-1-yl)benzonitrile (3d):** Pale yellow liquid (31.81 mg, 70%); <sup>1</sup>H NMR (500 MHz, Chloroform-*d*) δ 7.55 (dd, *J* = 7.6, 1.7 Hz, 1H), 7.47 (ddd, *J* = 8.9, 7.4, 1.7 Hz, 1H), 7.02 – 6.97 (m, 2H), 5.89 (ddt, *J* = 16.9, 10.1, 6.7 Hz, 1H), 5.25 – 5.17 (m, 2H), 3.26 – 3.24 (m, 4H), 3.09 (dt, *J* = 6.7, 1.3 Hz, 2H), 2.69 – 2.67 (m, 4H); <sup>13</sup>C NMR (125 MHz, Chloroform-*d*) δ 155.7, 134.6, 134.3, 133.8, 121.7, 118.6, 118.4, 106.0, 61.6, 53.0, 51.5; **HRMS** (ESI-TOF) *m/z*: [M + H]<sup>+</sup> Calculated for C<sub>14</sub>H<sub>18</sub>N<sub>3</sub><sup>+</sup> 228.1495 Found 228.1502.

**1-Allyl-4-(4-(trifluoromethyl)phenyl)piperazine (3e):** Pale yellow liquid (38.91 mg, 72%); <sup>1</sup>H NMR (500 MHz, Chloroform-*d*) δ 7.48 – 7.47 (m, 2H), 6.93 – 6.91 (m, 2H), 5.89 (ddt, *J* = 16.9, 10.2, 6.6 Hz, 1H), 5.26 – 5.19 (m, 2H), 3.31 – 3.29 (m, 4H), 3.07 (dt, *J* = 6.6, 1.3 Hz, 2H), 2.62 – 2.60 (m, 4H); <sup>13</sup>C NMR (125 MHz, Chloroform-*d*) δ 153.2, 134.5, 126.3 (q, <sup>3</sup>*J*<sub>C-F</sub> = 3.77 Hz), 101.9 (q, <sup>1</sup>*J*<sub>C-F</sub> = 270.92 Hz), 120.4 (q, <sup>2</sup>*J*<sub>C-F</sub> = 32.50 Hz), 118.5, 114.5, 61.6, 52.7, 47.9; **HRMS** (ESI-TOF) *m/z*: [M + H]<sup>+</sup> Calculated for C<sub>14</sub>H<sub>18</sub>F<sub>3</sub>N<sub>2</sub><sup>+</sup> 271.1417, Found 271.1422.

**1-Allyl-4-(4-chlorophenyl)piperazine (3f):** Pale yellow liquid (42.62 mg, 90%); <sup>1</sup>H NMR (500 MHz, Chloroform-*d*) δ 7.21 – 7.18 (m, 2H), 6.85 – 6.82 (m, 2H), 5.89 (ddt, *J* = 16.8, 10.2, 6.6 Hz, 1H), 5.25 – 5.17 (m, 2H), 3.19 – 3.17 (m, 4H), 3.06 (dt, *J* = 6.6, 1.3 Hz, 2H), 2.61 – 2.59 (m, 4H); <sup>13</sup>C NMR (125 MHz, Chloroform-*d*) δ 149.9, 134.7, 128.9, 124.4, 118.3, 117.2, 61.7, 52.9, 49.1; **HRMS** (ESI-TOF) *m/z*: [M + H]<sup>+</sup> Calculated for C<sub>13</sub>H<sub>18</sub>ClN<sub>2</sub><sup>+</sup> 237.1153 Found 237.1154.

## 9. NMR spectra ( $^1\text{H}$ , $^{13}\text{C}$ , $^{19}\text{F}$ )

### 1-Allyl-4-phenylpiperazine (3a): $^1\text{H}$ NMR (500 MHz, $\text{CDCl}_3$ )

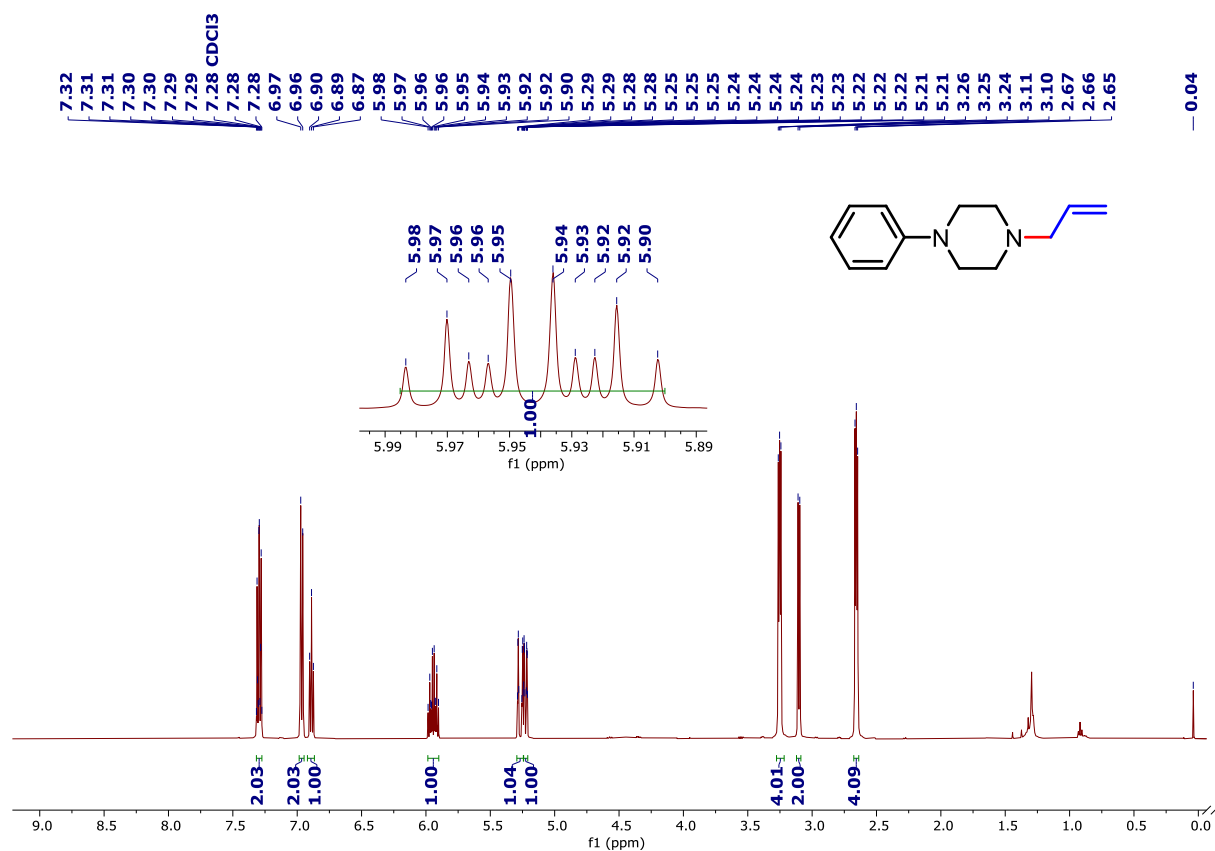

### 1-Allyl-4-phenylpiperazine (3a): $^{13}\text{C}$ NMR (125 MHz, $\text{CDCl}_3$ )

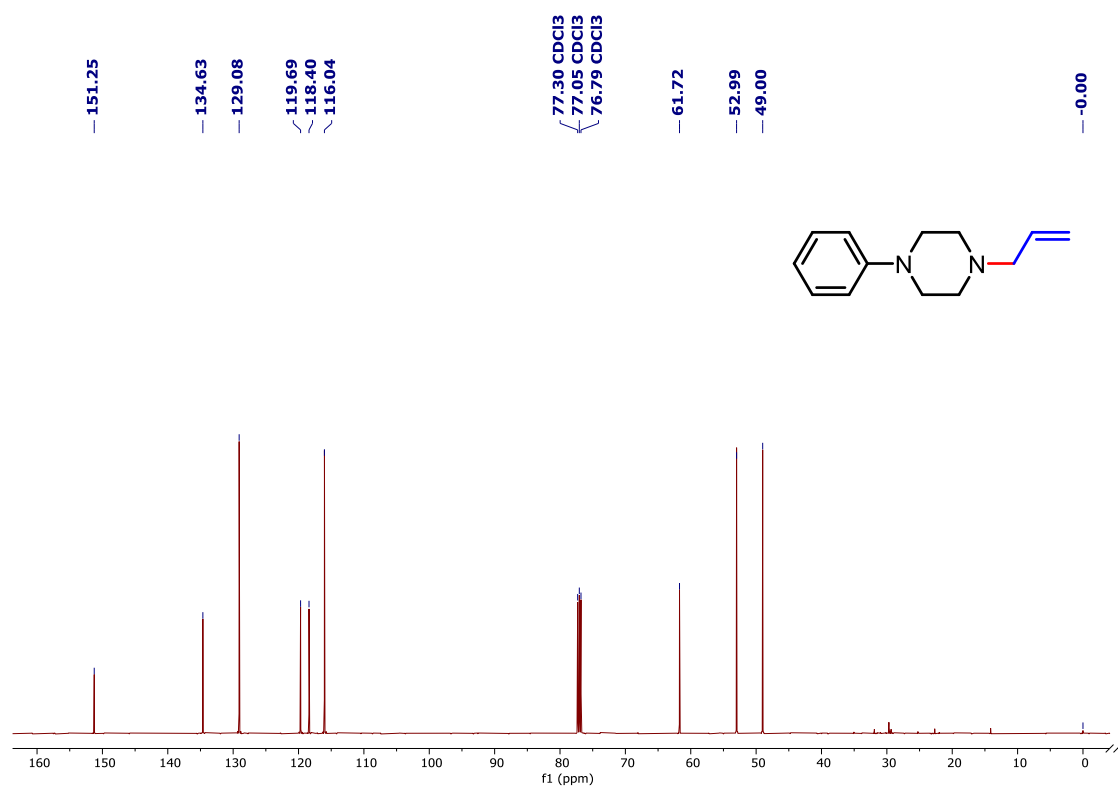

**2,2,2-Trifluoro-1-(4-phenylpiperazin-1-yl)ethan-1-one (4a):**  $^1\text{H}$  NMR (500 MHz,  $\text{CDCl}_3$ )

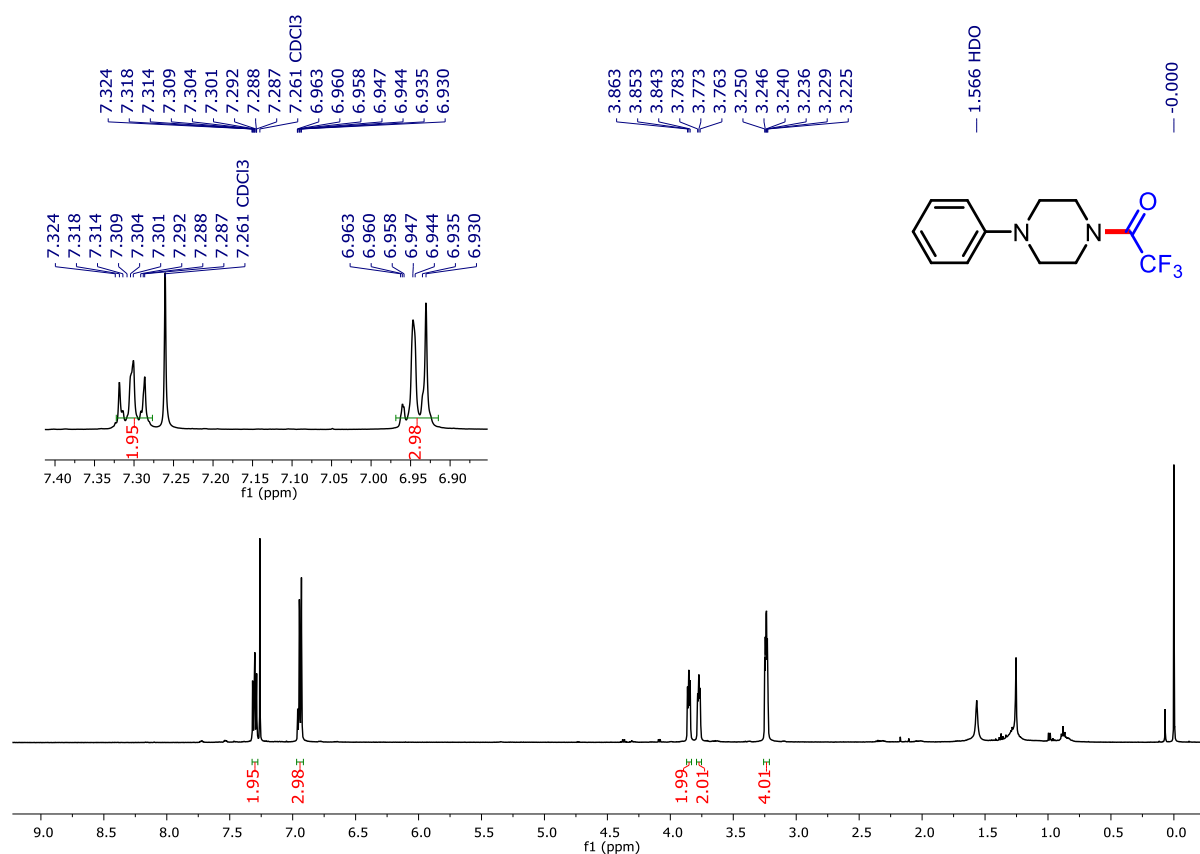

**2,2,2-Trifluoro-1-(4-phenylpiperazin-1-yl)ethan-1-one (4a):**  $^{13}\text{C}$  NMR (125 MHz,  $\text{CDCl}_3$ )

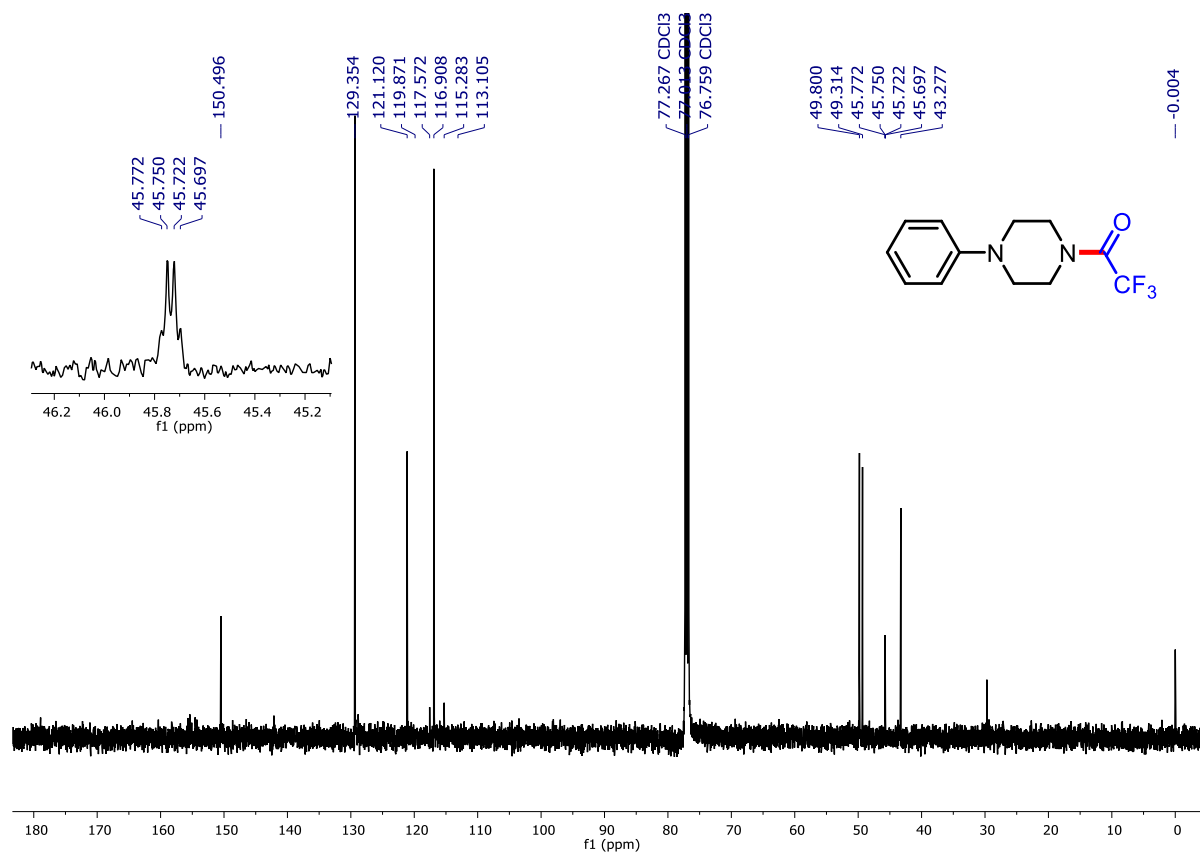



**2,2,2-Trifluoro-1-(4-phenylpiperazin-1-yl)ethan-1-one (4a):**  $^{19}\text{F}$  NMR (471 MHz,  $\text{CDCl}_3$ )

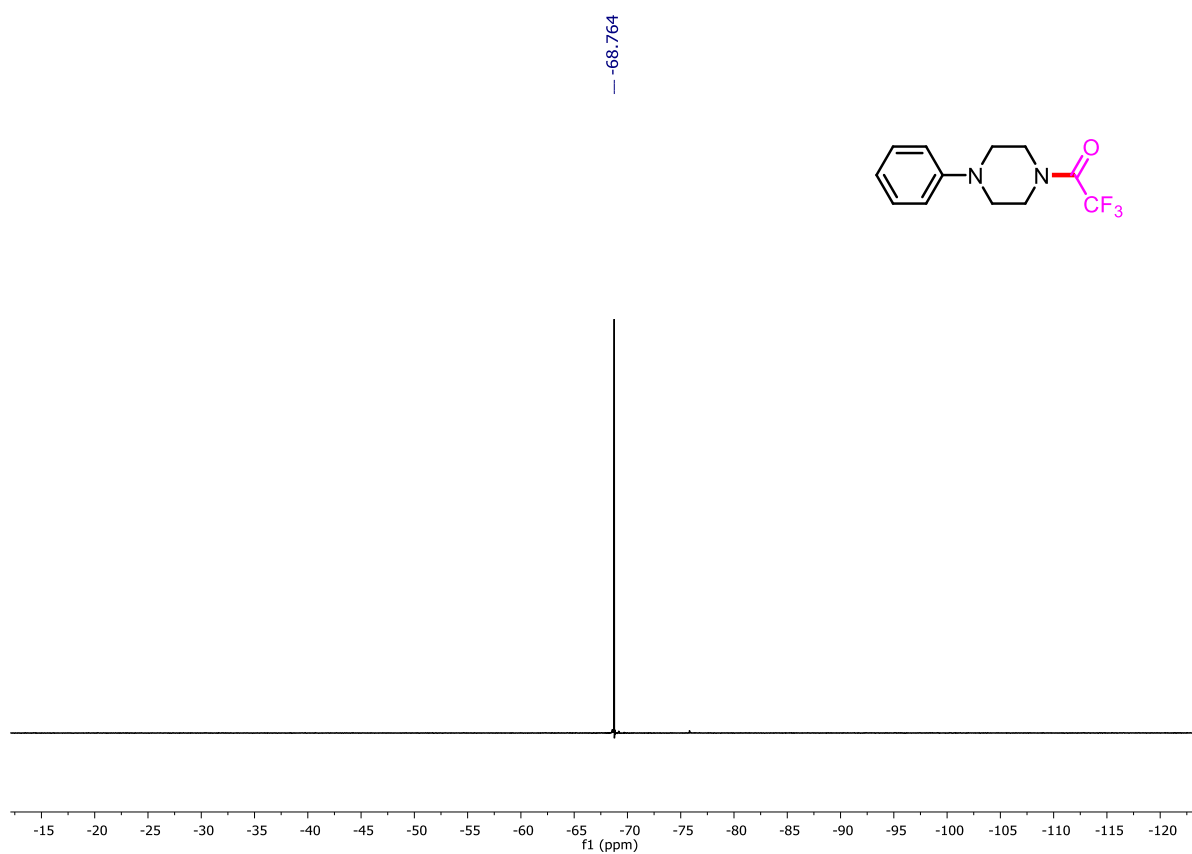

**Allyl 2-oxo-2-(4-phenylpiperazin-1-yl)acetate (4b):**  $^1\text{H}$  NMR (500 MHz,  $\text{CDCl}_3$ )

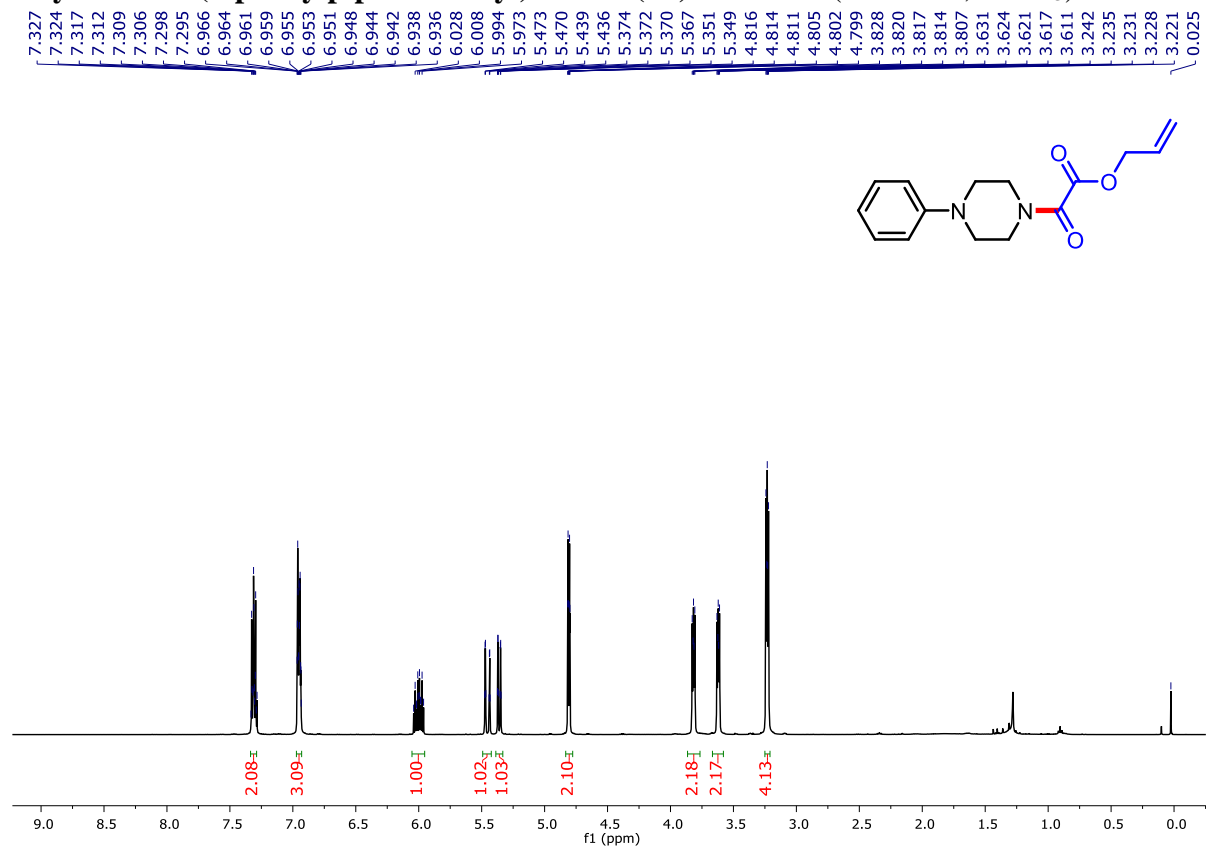

**Allyl 2-oxo-2-(4-phenylpiperazin-1-yl)acetate (4b):**  $^{13}\text{C}$  NMR (125 MHz,  $\text{CDCl}_3$ )

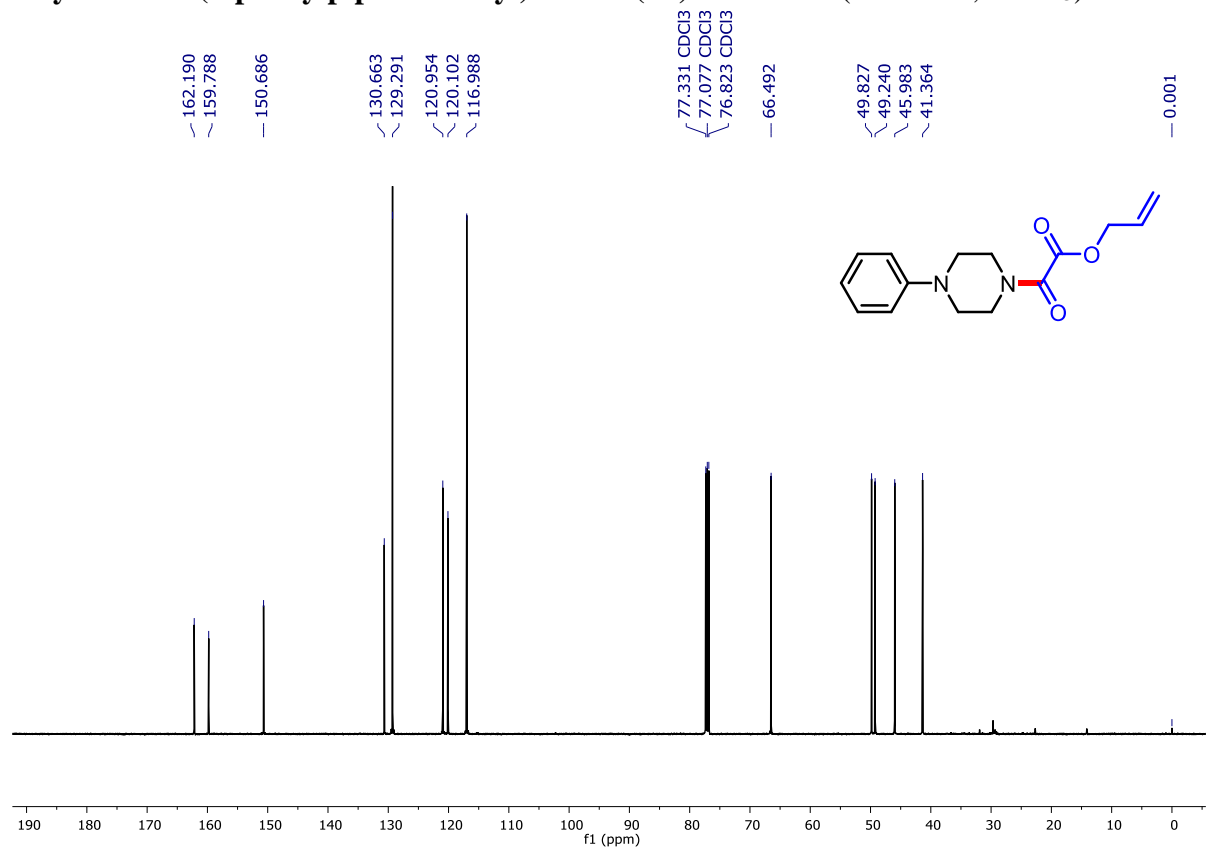

**1-(allyloxy)-3-(4-phenylpiperazin-1-yl)propan-2-ol (4c):**  $^1\text{H}$  NMR (500 MHz,  $\text{CDCl}_3$ )

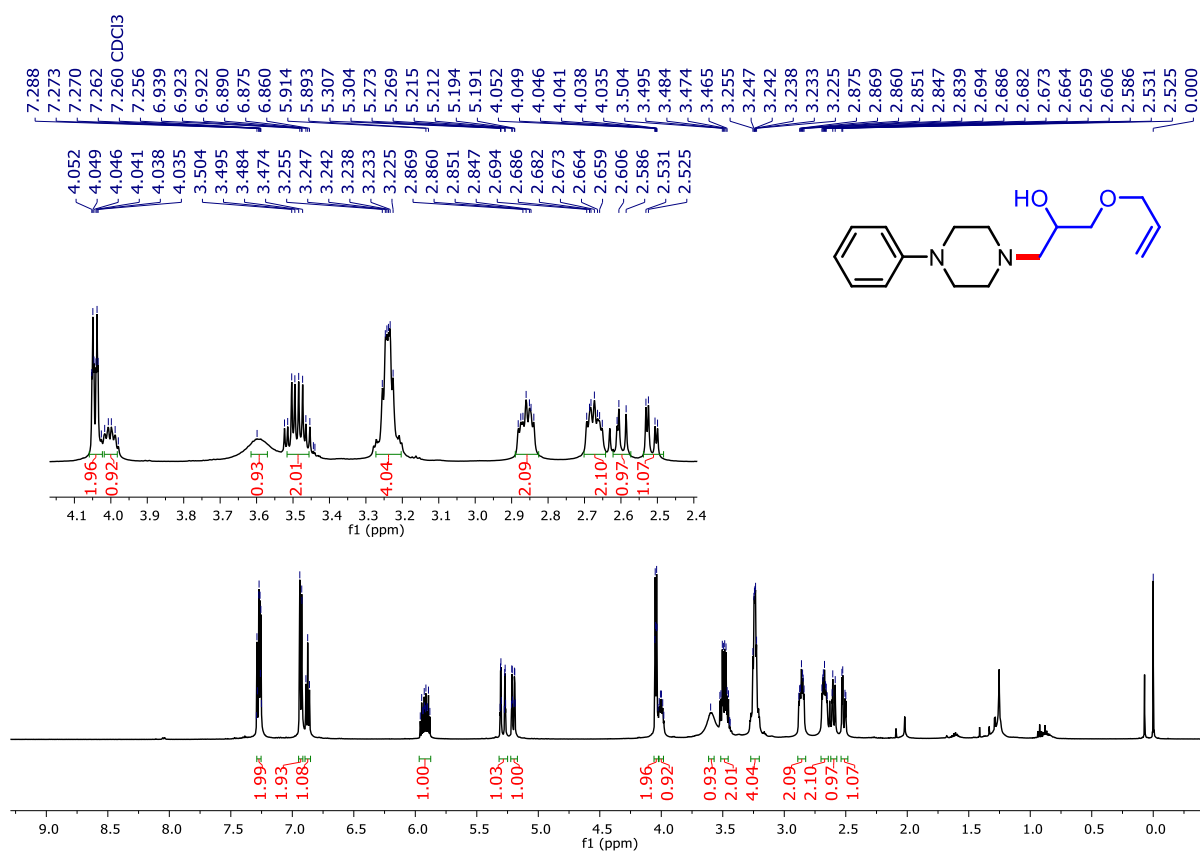

**1-(allyloxy)-3-(4-phenylpiperazin-1-yl)propan-2-ol (4c):**  $^{13}\text{C}$  NMR (125 MHz,  $\text{CDCl}_3$ )

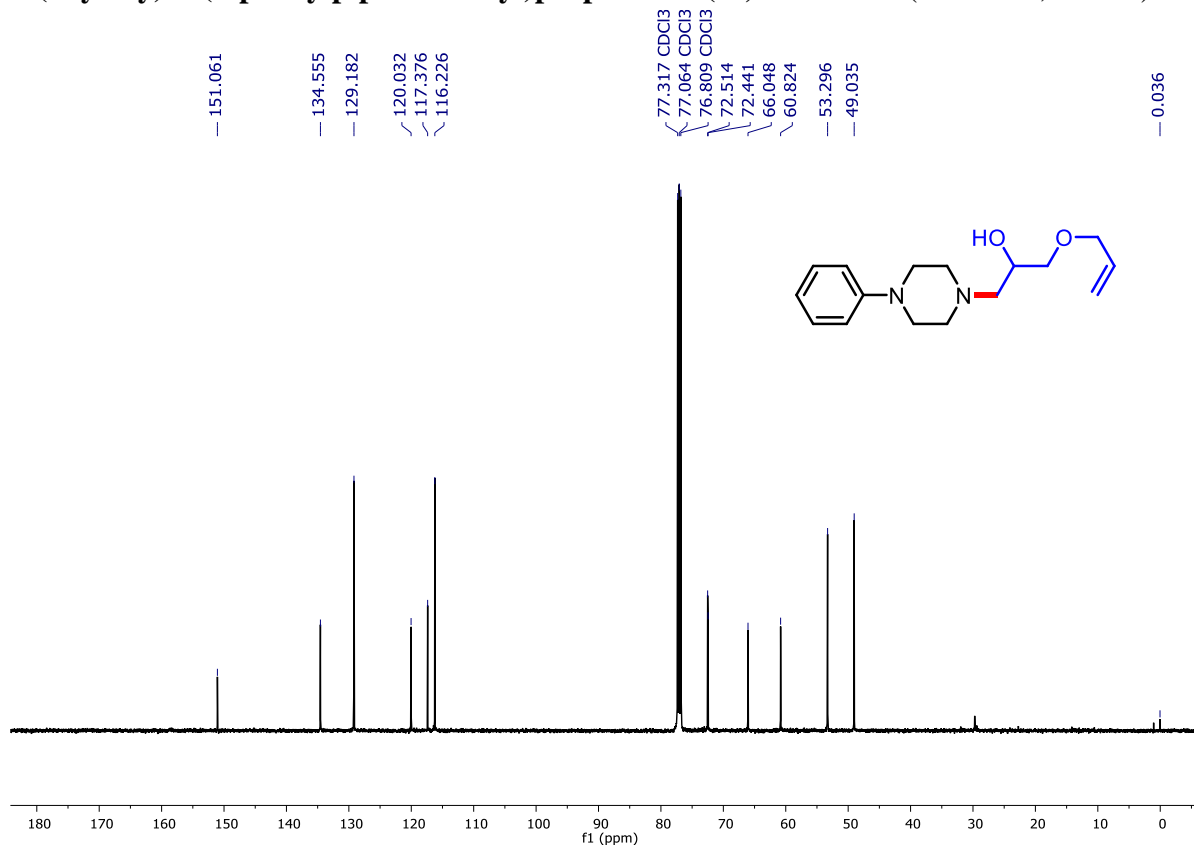

***N*-allyl-4-phenylpiperazine-1-carboxamide (4d):**  $^1\text{H}$  NMR (500 MHz,  $\text{CDCl}_3$ )

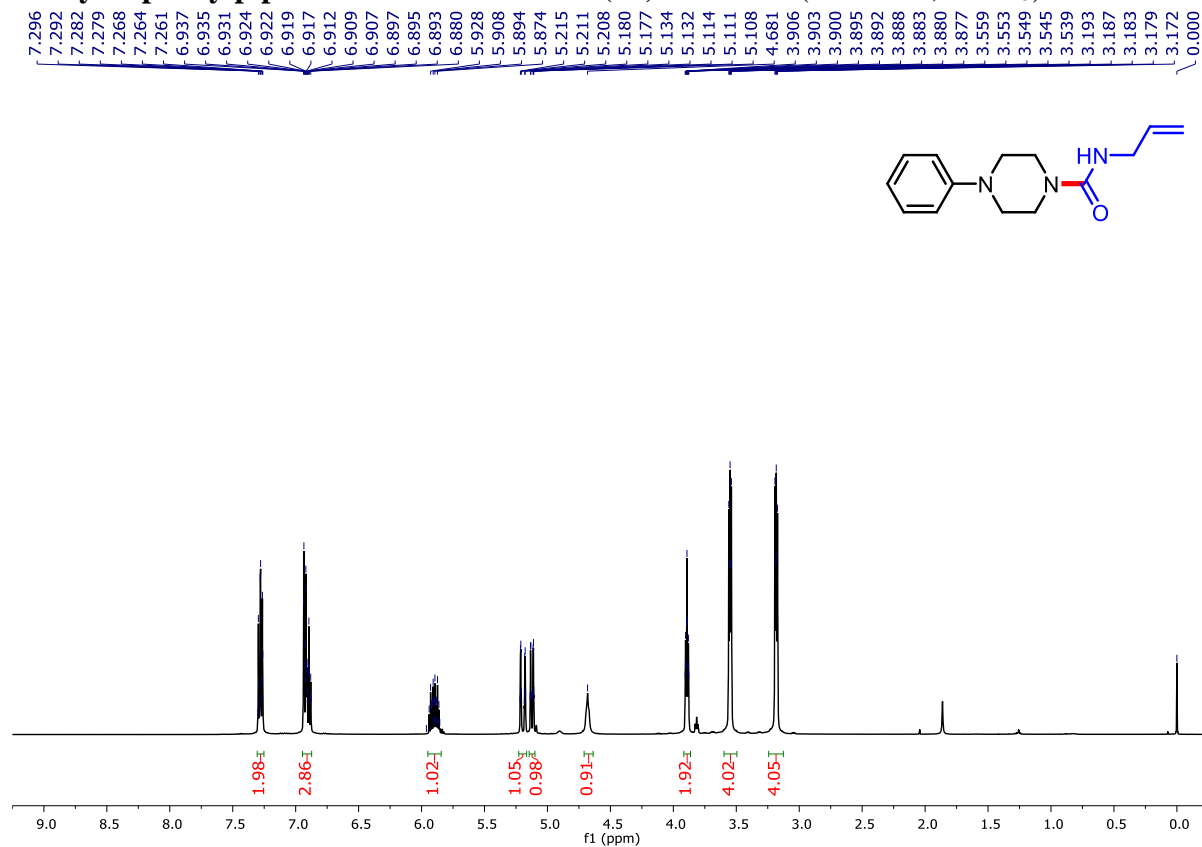

***N*-allyl-4-phenylpiperazine-1-carboxamide (4d):**  $^{13}\text{C}$  NMR (125 MHz,  $\text{CDCl}_3$ )

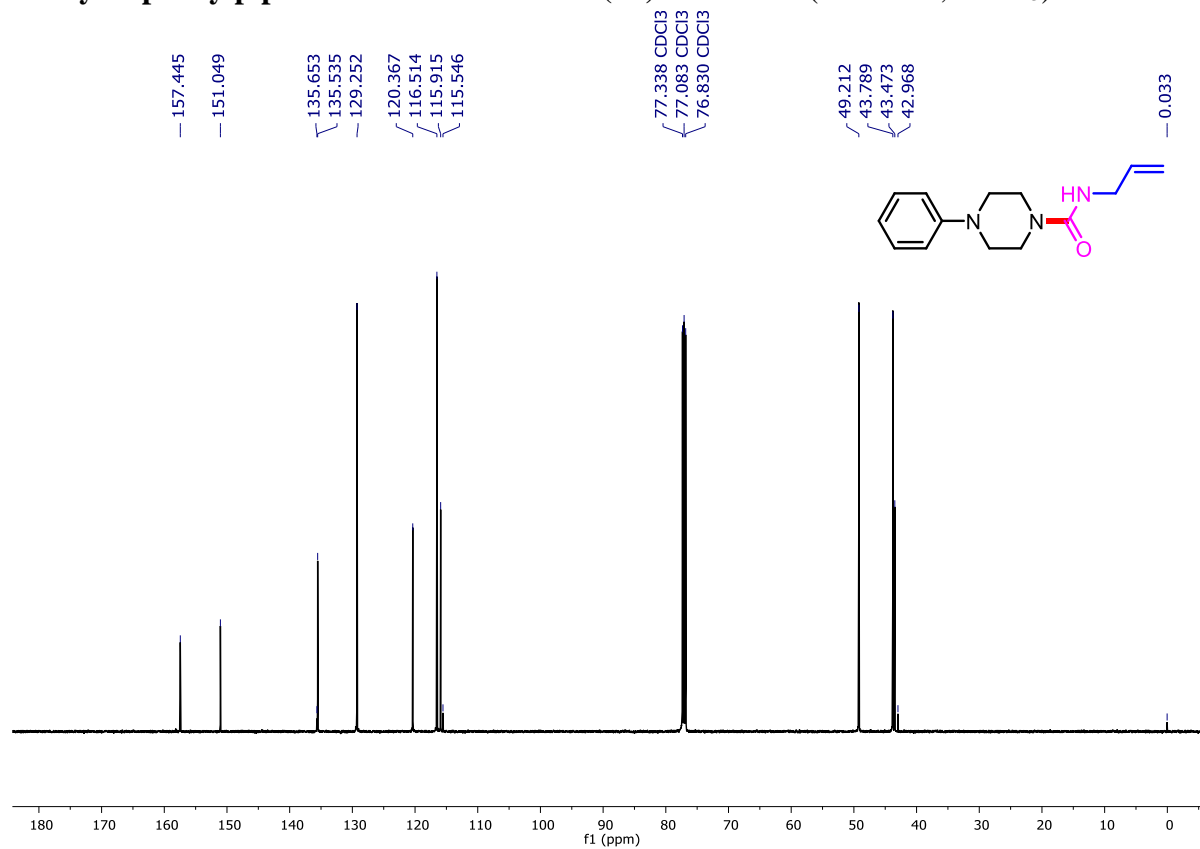

**1-allyl-4-(p-tolyl)piperazine (3b):  $^1\text{H}$  NMR (500 MHz,  $\text{CDCl}_3$ )**

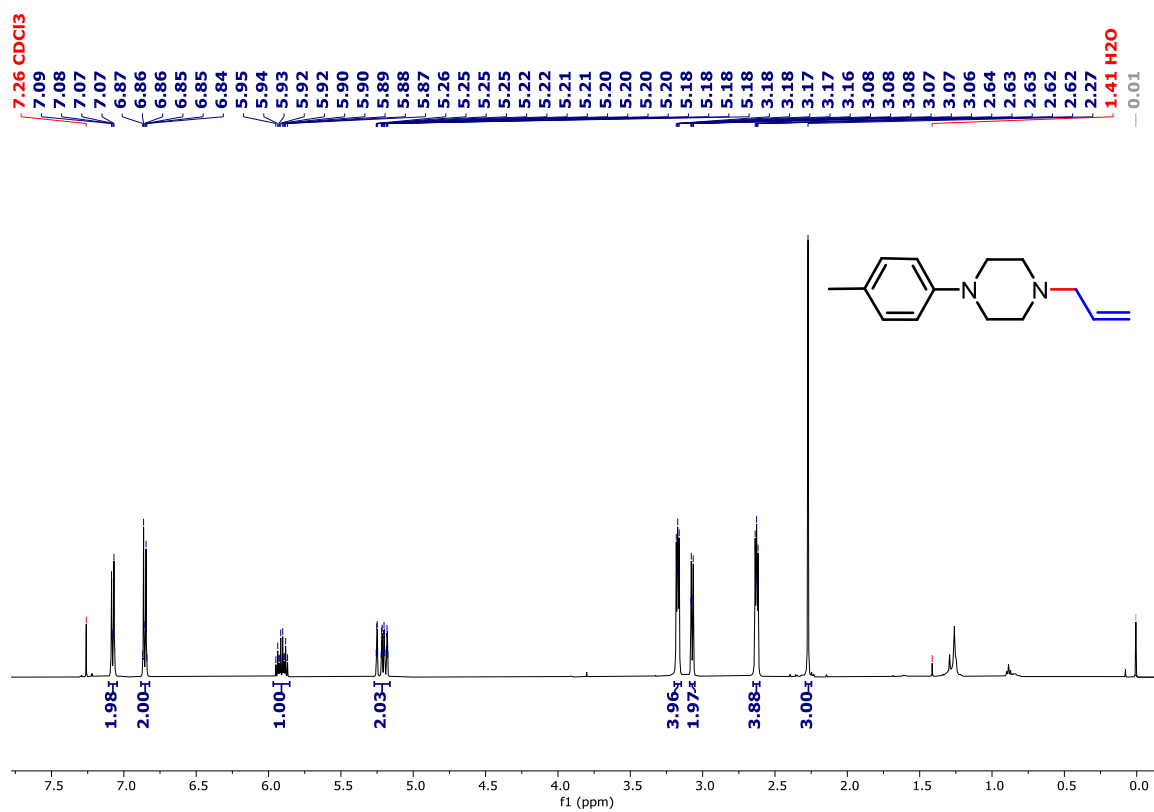

**1-allyl-4-(p-tolyl)piperazine (3b):  $^{13}\text{C}$  NMR (125 MHz,  $\text{CDCl}_3$ )**

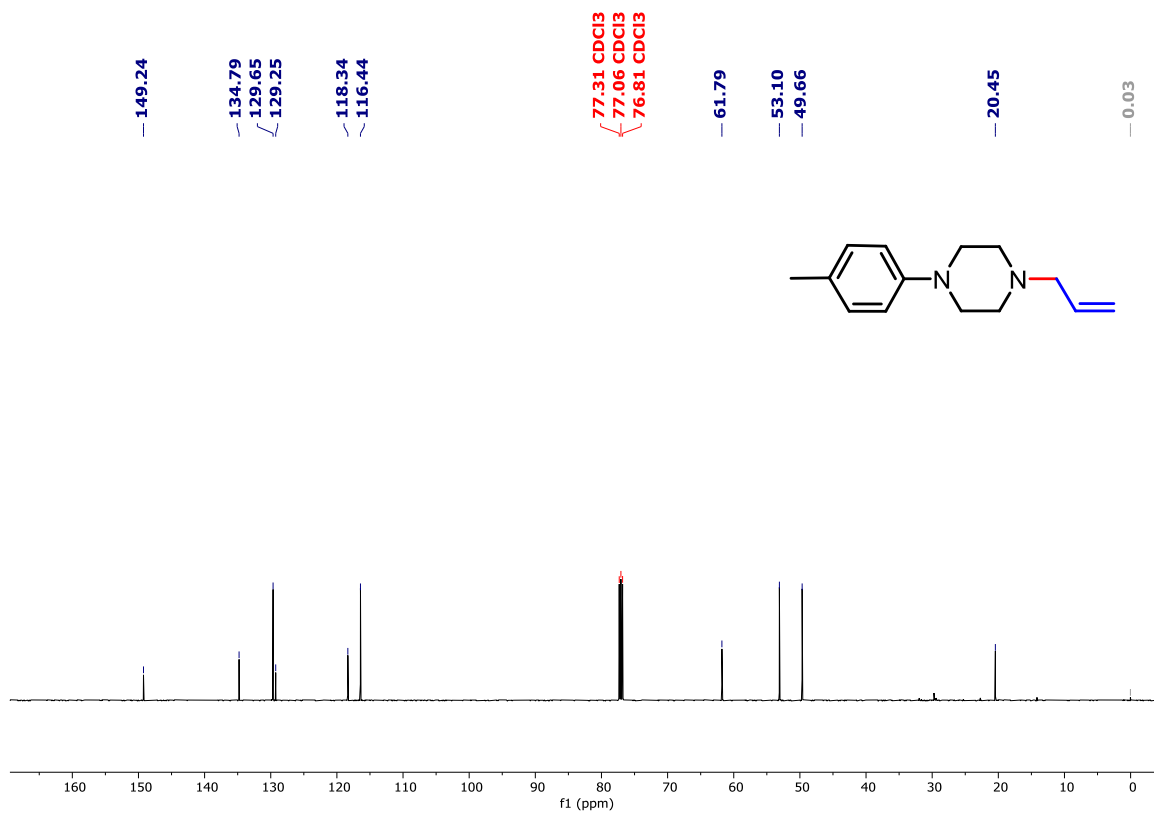

**1-allyl-4-(3-methoxyphenyl)piperazine (3c):**  $^1\text{H}$  NMR (500 MHz,  $\text{CDCl}_3$ )

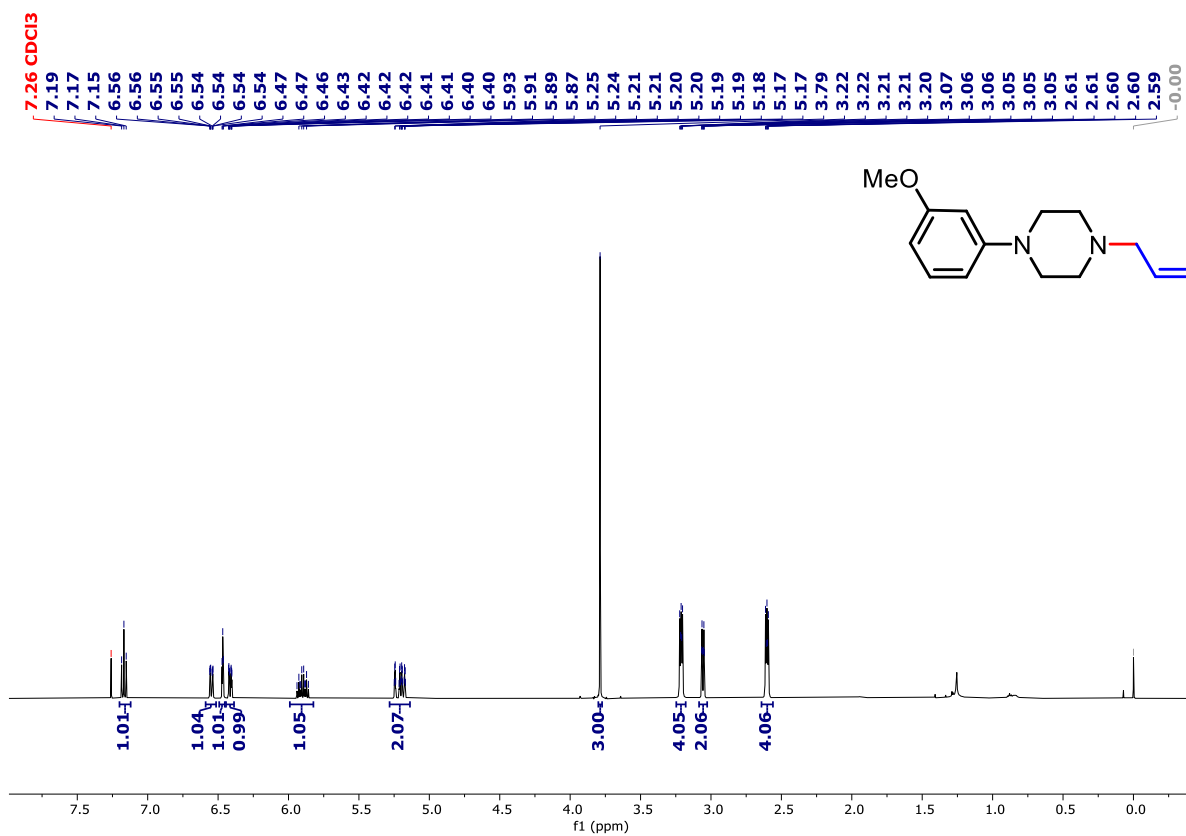

**1-allyl-4-(3-methoxyphenyl)piperazine (3c):**  $^{13}\text{C}$  NMR (125 MHz,  $\text{CDCl}_3$ )

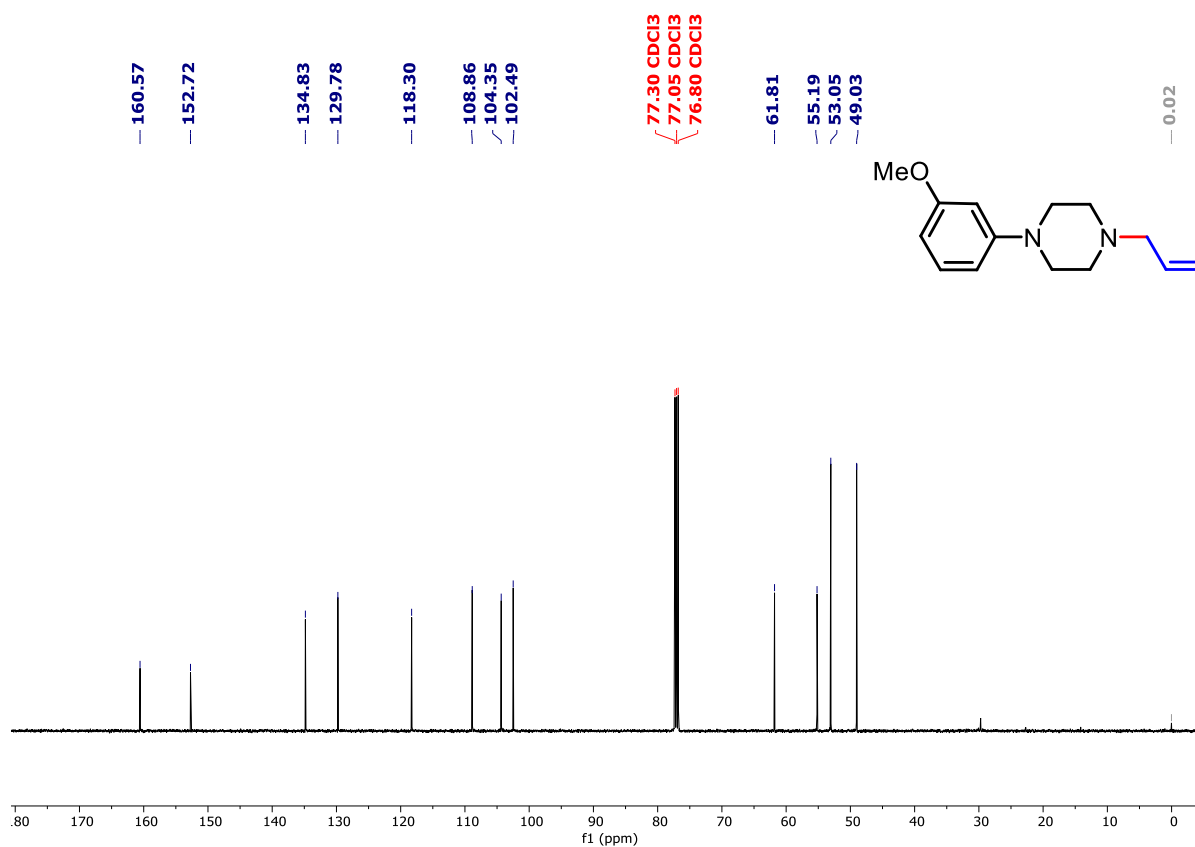

**2-(4-allylpiperazin-1-yl)benzonitrile (3d):**  $^1\text{H}$  NMR (500 MHz,  $\text{CDCl}_3$ )

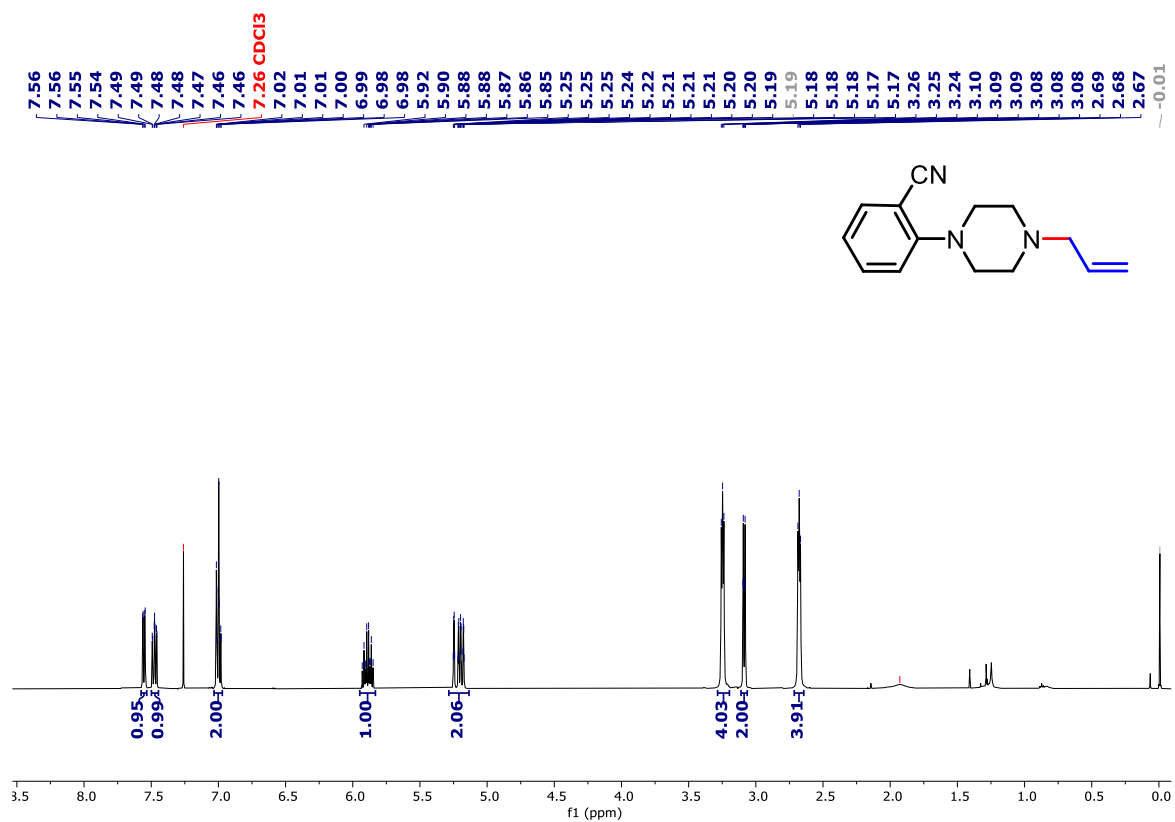

**2-(4-allylpiperazin-1-yl)benzonitrile (3d):**  $^{13}\text{C}$  NMR (125 MHz,  $\text{CDCl}_3$ )

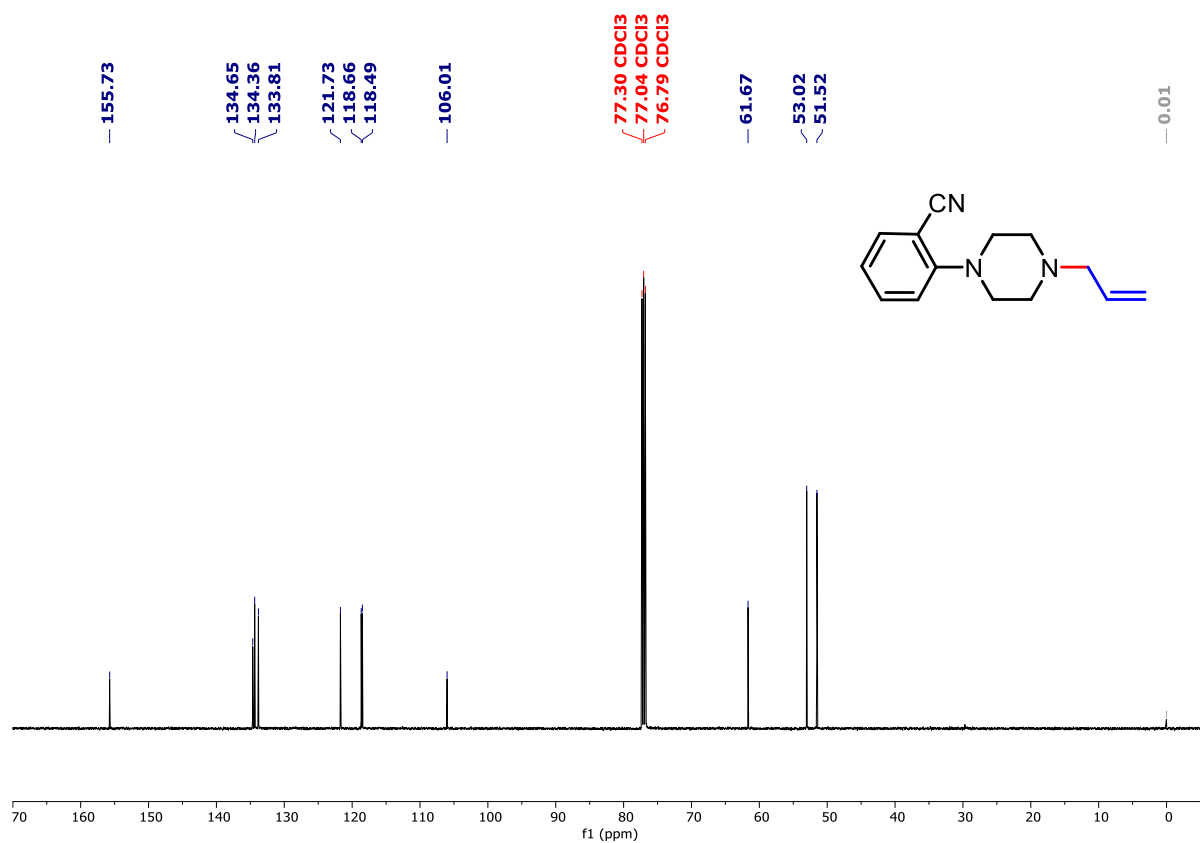

**1-allyl-4-(4-(trifluoromethyl)phenyl)piperazine (3e):**  $^1\text{H}$  NMR (500 MHz,  $\text{CDCl}_3$ )

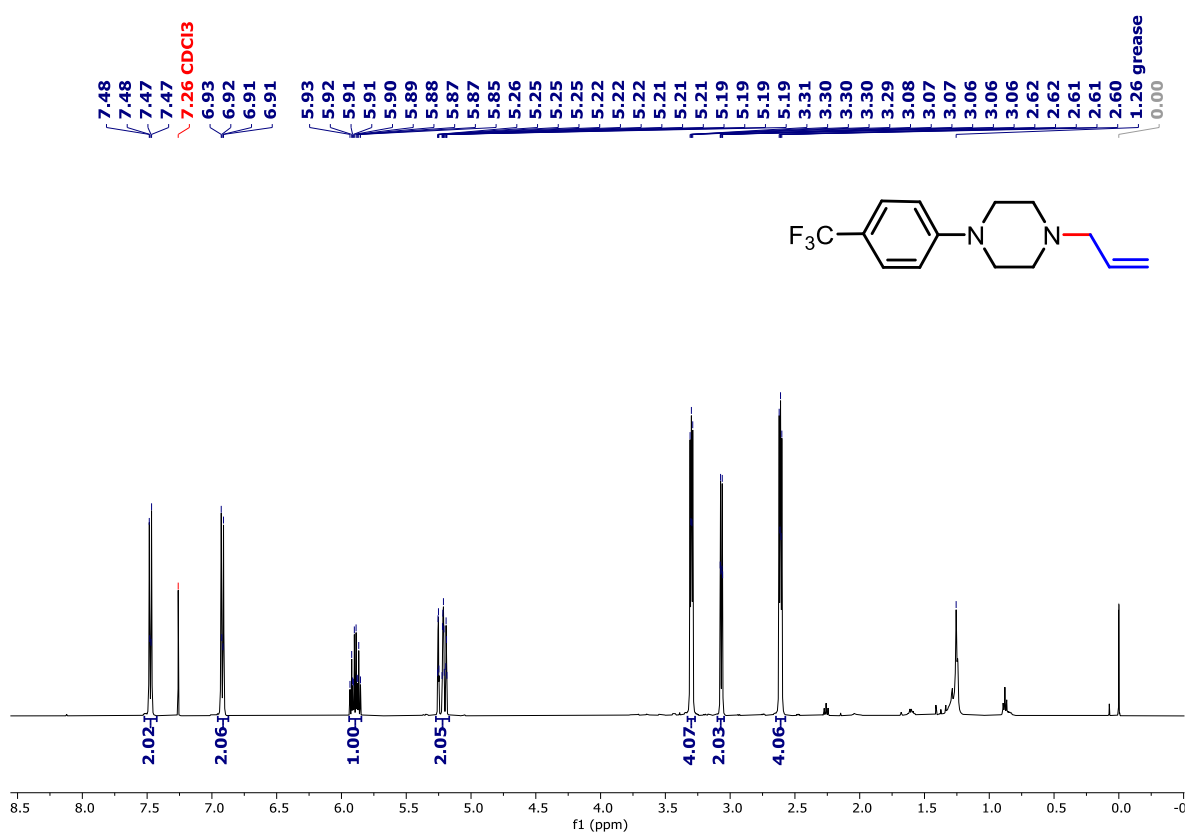

**1-allyl-4-(4-(trifluoromethyl)phenyl)piperazine (3e):**  $^{13}\text{C}$  NMR (125 MHz,  $\text{CDCl}_3$ )

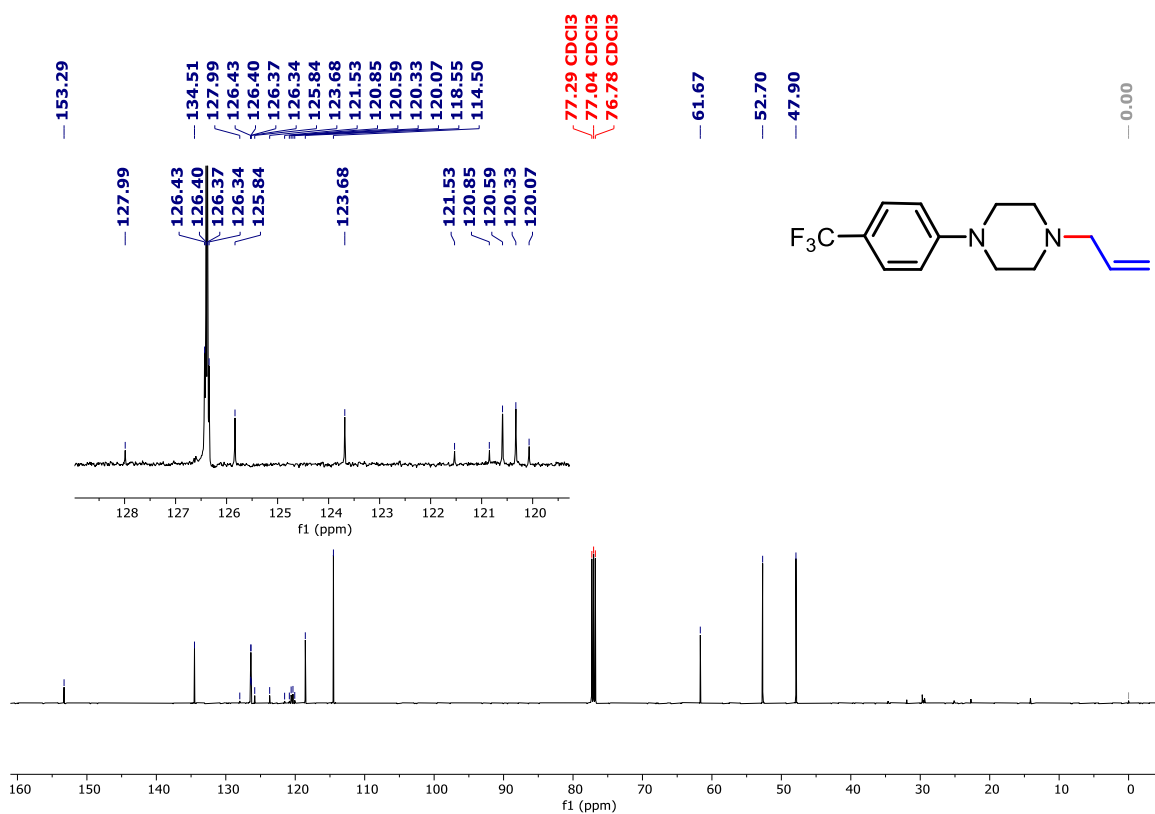



**1-allyl-4-(4-chlorophenyl)piperazine (3f):**  $^1\text{H}$  NMR (500 MHz,  $\text{CDCl}_3$ )

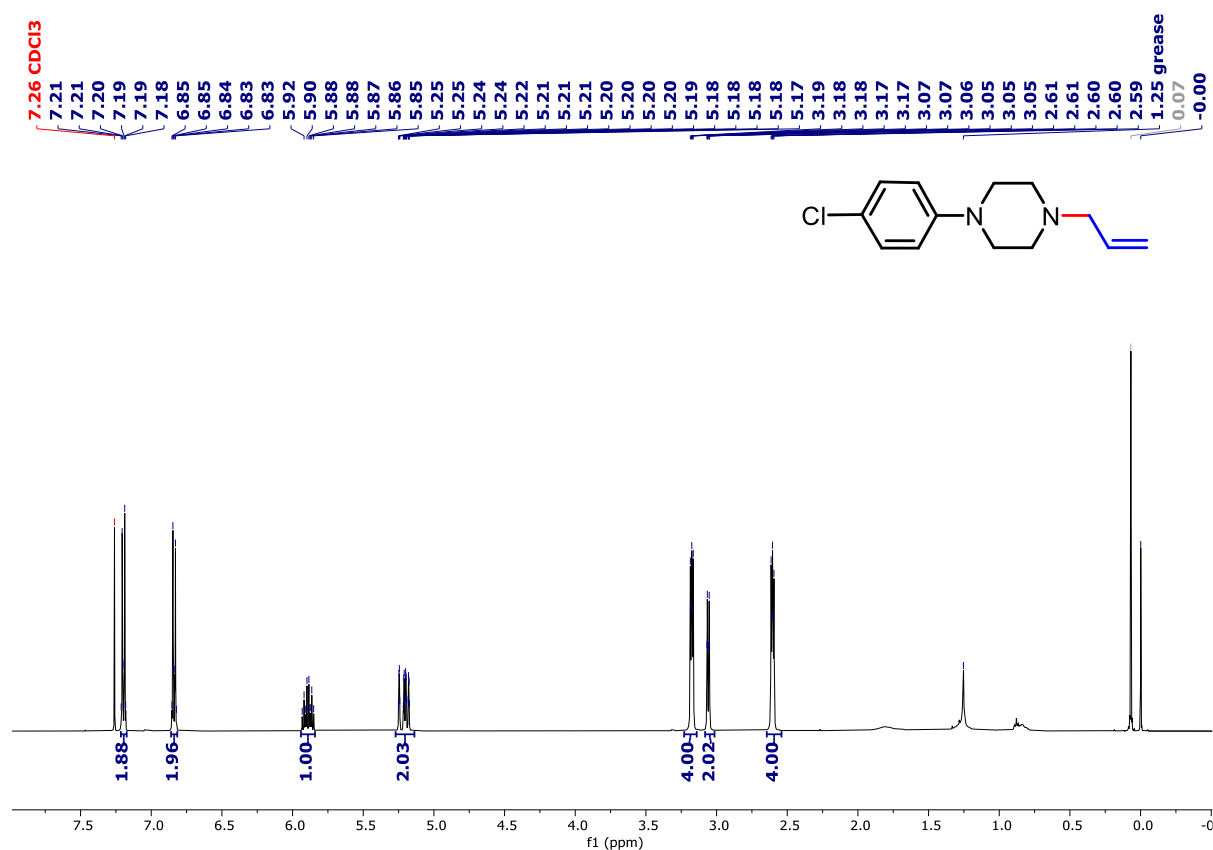

**1-allyl-4-(4-chlorophenyl)piperazine (3f):**  $^{13}\text{C}$  NMR (125 MHz,  $\text{CDCl}_3$ )

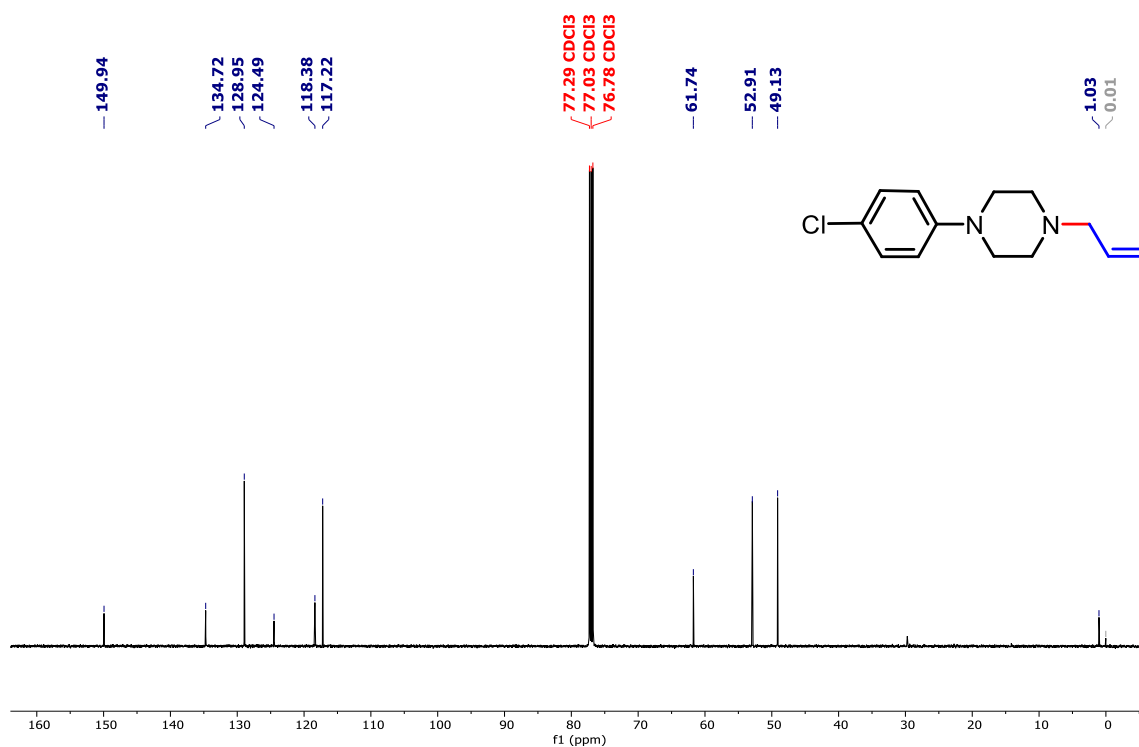

Supplement: d3gc04216b1.pdf [file d3gc04216b1.pdf]
